# Supplementary material for: Manganese(iii) acetate-mediated activation of C–H bonds of weak CH-acids; addition ofo-carborane, its derivatives, and some other CH-acids to [60]-fullerene
Source: Royal Society of Chemistry journal article supplement (doi:10.1039/c8dt04565h), 2019-01-01
Supplement: c8dt04565h1.pdf [file c8dt04565h1.pdf]

Electronic Supplementary information

**Manganese(III) acetate-mediated activation of C-H bonds of weak C-H acids; addition of *o*-caboranes, its derivatives and some organic CH-acids to [60]-fullerene**

**Boris L. Tumanskii,<sup>\*,a,b</sup> Denis S. Sabirov,<sup>c</sup> Stanislav P. Solodovnikov<sup>a</sup> and Yury I. Lyakhovetsky<sup>\*,a</sup>**

<sup>a</sup> *A.N. Nesmeyanov Institute of Organoelement Compounds of the Russian Academy of Sciences, 28 Vavilov St., 119991 GSP-1 Moscow V-334, Russia. E-mail: yulyakh@ineos.ac.ru*

<sup>b</sup> *Present address: Shulich Faculty of Chemistry, Technion–Israel Institute of Technology, Haifa Israel. E-mail: tboris@tx.technion.ac.il*

<sup>c</sup> *Institute of Petrochemistry and Catalysis, Russian Academy of Sciences, 450075 Ufa, Russia.*

**1. Additional mass spectra**

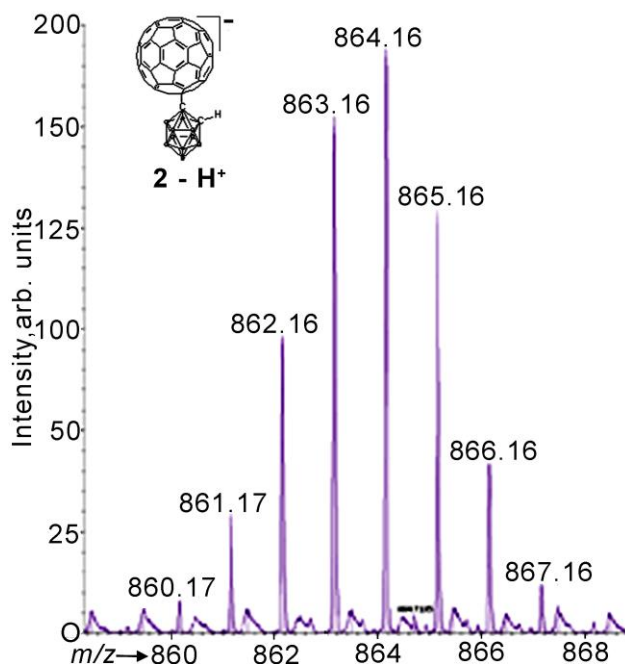

**Fig. S1** NI APCI mass spectrum of a benzene solution of product **2** from the reaction of C<sub>60</sub> with *o*-caborane and Mn(OAc)<sub>3</sub>·2H<sub>2</sub>O taken in the molar ratio of 1:2:2 carried out in chlorobezene at r.t. for 3 h.

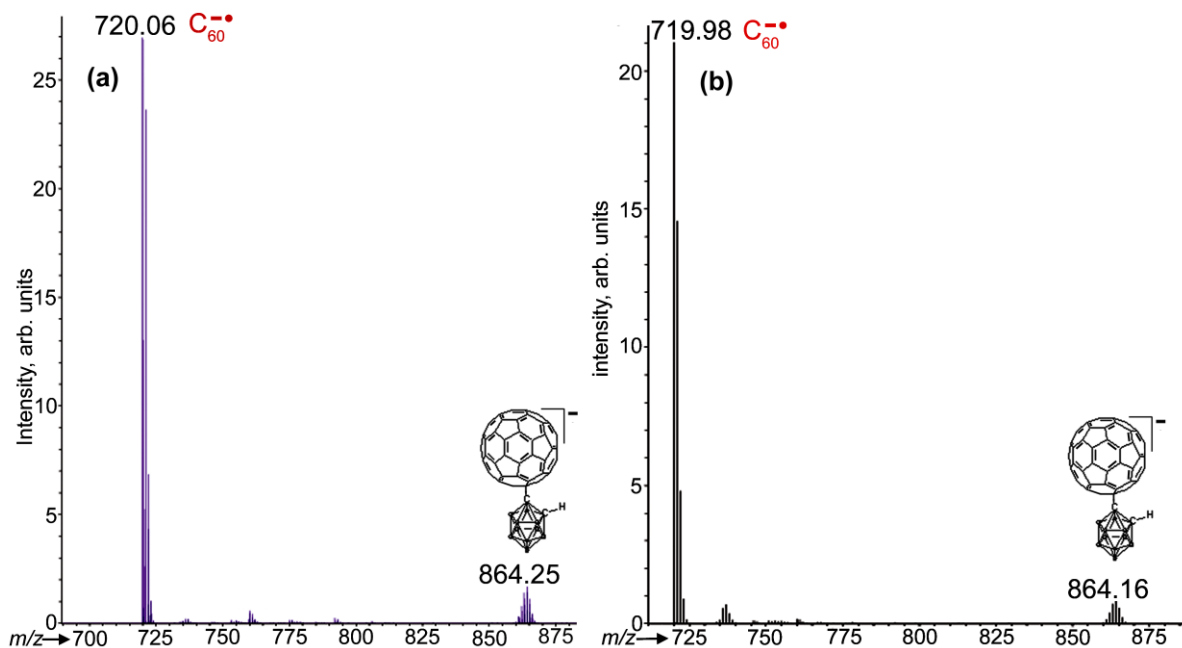

**Fig. S2.** NI APCI mass spectra in the high mass region of the products from the reaction of  $C_{60}$  with *o*-carborane and  $Mn(OAc)_3 \cdot 2H_2O$  (molar ratio 1:21:20) carried out in chlorobenzene at 100 °C; the spectra were recorded (a) after 1h of heating and (b) after 11 h.

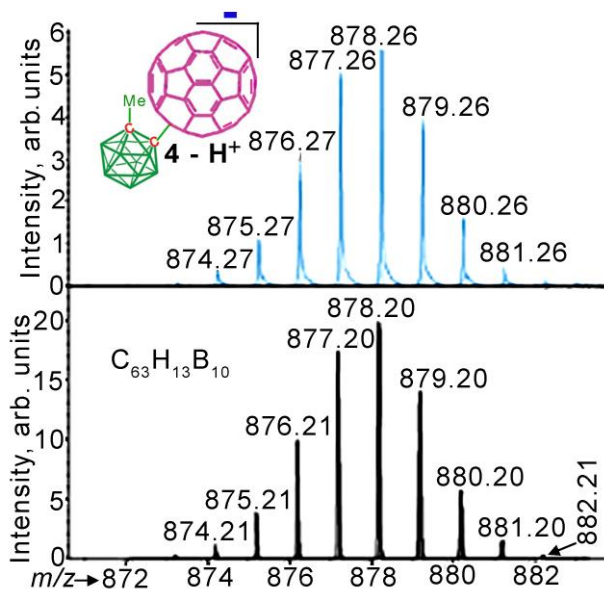

**Fig. S3.** NI APCI mass spectrum of product **4** from the reaction of  $C_{60}$  with 1-Me-*o*-carborane and  $Mn(OAc)_3 \cdot 2H_2O$  taken in the molar ratio of 1:20:20 conducted in chlorobenzene at r.t. for 168 h.

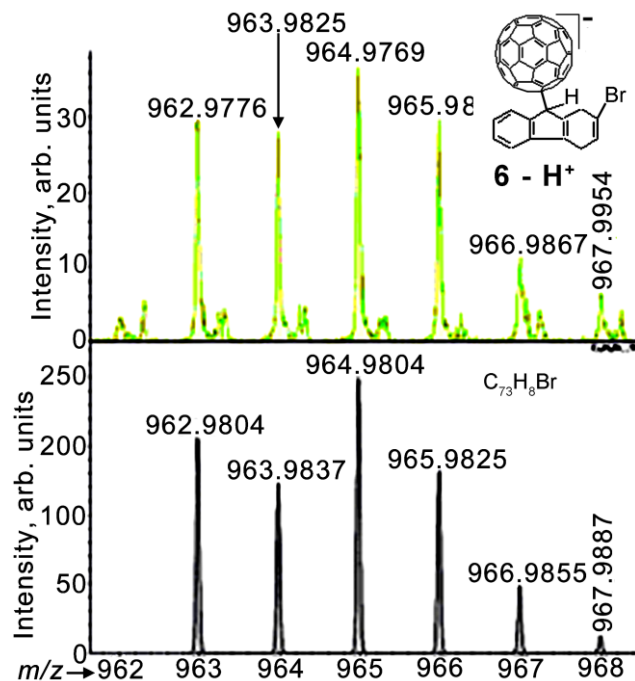

**Fig. S4.** (a) NI APCI mass spectrum of product **6** obtained *via* the reaction of  $C_{60}$  with 2-Br-9H-fluorene and  $Mn(OAc)_3 \cdot 2H_2O$  (molar ratio 1:20:20) carried out in chlorobenzene at r.t. for 144 h, (b) Simulated spectrum of deprotonated **6**.

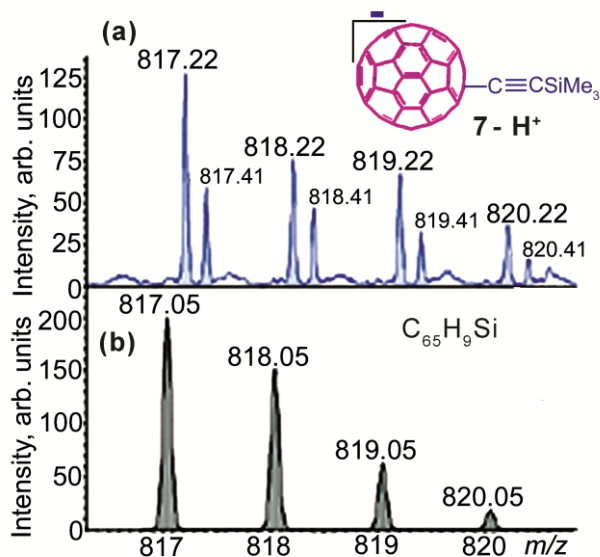

**Fig. S5.** (a) NI APCI mass spectrum of  $HC_{60}C_2SiMe_3$  (**7**) obtained from the reaction of  $C_{60}$  with trimethylsilylacetylene and  $Mn(OAc)_3 \cdot 2H_2O$  (molar ratio 1:20:20) conducted in chlorobenzene at r.t. for 144 h, (b) Simulated spectrum of deprotonated **7**.

## 2. Notes.

Note 1. It was shown that  $Mn(OAc)_3 \cdot 2H_2O$  appeared in the NI APCI mass spectrum as anion  $Mn(OAc)_3$  (an ion peak at  $m/z$  231.95, calculated 231.978), i.e., water was lost in the course of

mass spectral analysis. Thus, basing on the MS analysis, we cannot tell whether water retained or not in the products of the reactions of the change an acetyl group for carboranyl one or for other groups. Since it is of no significance for understanding the reaction mechanism, we decided on not to reflect water in the schemes of the reactions.

Note 2. Since mass spectrometer is a chemical reactor, there was a possibility that  $C_{60}$  and *o*-carborane could react in the APCI ion source of it under corona discharge as it was observed in the electron ionization (EI) source of a mass spectrometer.<sup>S1</sup> The reaction could also proceed in the mass spectrometer between all three reagents, especially so since the vaporizer of it was heated at 350 °C. In this connection a test experiment was performed under the same conditions with the same amounts of  $C_{60}$ , *o*-carborane, and the solvent. The NI APCI mass spectrum displayed virtually no fullerene derivatives. An 1 ml sample was taken, chlorobenzene was replaced by benzene, and 10 mg (0.04 mmol; *ca.* one tenth of the amount that was used in the run which the test one was compared with) of  $Mn(OAc)_3 \cdot 2H_2O$  were added. The solution was then subjected to NI APCI mass spectrometry. Very small intensity ion peaks of monoadduct **2** were found in the spectrum (the relative abundance of the 854 Da ion in respect to that of the 720 Da ion [ $C_{60}^{+•}$ ] was 4%). At the same time, this abundance proved to be 25% after 68 h of the reaction in the experiment the test one was compared with. The abundance achieved 65%, and pronounced polyaddition was observed after 168 h (Fig. 4). Thus, all indicates that the reactions investigated occurred mainly outside of the mass spectrometer. This conclusion finds support in the facts that in several experiments, signals of paramagnetic fullerene derivatives, though weak, were registered when samples of the reaction mixtures were irradiated by visible light indicating the presence the corresponding dimers.

Note 3. These values are not the actual yields of the adducts because they don't take into account the difference in volatilities and cross-sections of ionization between the adducts and  $C_{60}$ . Moreover, some fractionation could occur when the reaction mixtures (after the removal of chlorobenzene) were extracted by benzene for the MS analyses. Nevertheless, in spite of all of this, these values provide a certain picture of the efficiency of the processes.

### 3. Details of the quantum-chemical calculations

The PBE/3 $\zeta$  density functional theory method (Priroda 11 program) was used for calculations as it accurately describes thermodynamic and kinetic parameters of fullerene reactions, and spectral and physicochemical parameters of fullerene compounds.

The structures obtained by the standard DFT-optimizations were proved to correspond to the minima of the potential energy surfaces *via* the vibration modes solving (their hessians contain

no imaginary frequencies). Then the heat effects (enthalpy changes) in chemical reactions were calculated as the differences between the total energies  $E_{tot}$  of the resulting fullerene adduct and reactants taking into account the zero-point vibrational energy corrections  $\varepsilon_{ZPV}$  and the temperature corrections  $H_{corr}$  ( $T = 298$  K):

$$\Delta H_r^\circ = \sum_{products} (E_{tot,i} + \varepsilon_{ZPV,i} + H_{corr,i}) - \sum_{reactants} (E_{tot,i} + \varepsilon_{ZPV,i} + H_{corr,i})$$

The Gibbs energy changes were calculated similarly using the corrections  $G_{corr}$  ( $T = 298$  K):

$$\Delta G_r^\circ = \sum_{products} (E_{tot,i} + \varepsilon_{ZPV,i} + G_{corr,i}) - \sum_{reactants} (E_{tot,i} + \varepsilon_{ZPV,i} + G_{corr,i})$$

The spin densities and atomic charges were estimated within the Mulliken population analysis. The most stable structures of two *o*-carborane–fullerene radical adducts differ in spin density distribution due to different symmetry point groups ( $C_1$  versus  $C_s$ ) (Table S1).

**Table S1. Heat effects ( $\Delta H_r^\circ$ ), Gibbs free energies ( $\Delta G_r^\circ$ ) of formation, and spin density parameters of *o*-carboranylfullerenyl radicals**

| Fullerenyl radical (symmetry)                                                                                                                                                                               | Highest spin densities on the reaction sites in the positions relative to the carboranyl addend |                    |                    | $\Delta H_r^\circ$ ,<br>kJ mol <sup>-1</sup> | $\Delta G_r^\circ$ ,<br>kJ mol <sup>-1</sup> |
|-------------------------------------------------------------------------------------------------------------------------------------------------------------------------------------------------------------|-------------------------------------------------------------------------------------------------|--------------------|--------------------|----------------------------------------------|----------------------------------------------|
|                                                                                                                                                                                                             | <b>2</b>                                                                                        | <b>4</b>           | <b>16</b>          |                                              |                                              |
| <sup>•</sup> C <sub>60</sub> ( <i>o</i> -C <sub>2</sub> HB <sub>10</sub> H <sub>10</sub> )<br>(C <sub>1</sub> )<br>(C–C bond between the <i>o</i> -carboranyl moiety and C <sub>60</sub> )                  | 0.440                                                                                           | 0.220 <sup>a</sup> | 0.060 <sup>a</sup> | -359.8 <sup>b</sup><br>-102.2 <sup>c</sup>   | -350.6 <sup>b</sup><br>-55.0 <sup>c</sup>    |
| <sup>•</sup> C <sub>60</sub> (9- <i>o</i> -C <sub>2</sub> H <sub>2</sub> B <sub>10</sub> H <sub>9</sub> )<br>(C <sub>s</sub> )<br>(9-B–C bond between the <i>o</i> -carboranyl moiety and C <sub>60</sub> ) | 0.420                                                                                           | 0.203              | 0.088              | -154.0 <sup>d</sup>                          | -110.6 <sup>d</sup>                          |

<sup>a</sup> Average for two positions (a slight split of the spin density due to the unsymmetrical structure). <sup>b</sup> For the reaction C<sub>60</sub><sup>•+</sup> + [Mn(OAc)<sub>2</sub>(*o*-C<sub>2</sub>HB<sub>10</sub>H<sub>10</sub>)]<sup>•-</sup> → <sup>•</sup>C<sub>60</sub>(*o*-C<sub>2</sub>HB<sub>10</sub>H<sub>10</sub>) + <sup>•</sup>Mn(OAc)<sub>2</sub>, <sup>c</sup> for the reaction C<sub>60</sub> + (*o*-C<sub>2</sub>HB<sub>10</sub>H<sub>10</sub>)<sup>•</sup> → <sup>•</sup>C<sub>60</sub>(*o*-C<sub>2</sub>HB<sub>10</sub>H<sub>10</sub>) and <sup>d</sup> C<sub>60</sub> + (9-*o*-C<sub>2</sub>H<sub>2</sub>B<sub>10</sub>H<sub>9</sub>)<sup>•</sup> → <sup>•</sup>C<sub>60</sub>(9-*o*-C<sub>2</sub>H<sub>2</sub>B<sub>10</sub>H<sub>9</sub>).

**Table S2. Heat effects ( $\Delta H_r^\circ$ ) of dimerization and characteristics of *o*-carboranylfullerenyl radicals**

| $2 \cdot \text{C}_{60}(\textit{o}\text{-carboranyl}) \rightarrow [1,4,1',4'\text{-C}_{60}(\textit{o}\text{-carboranyl})]_2$ |                                           |                                                                                                                                            |                                                                    |                           |
|-----------------------------------------------------------------------------------------------------------------------------|-------------------------------------------|--------------------------------------------------------------------------------------------------------------------------------------------|--------------------------------------------------------------------|---------------------------|
| Type of the bond between the <i>o</i> -carboranyl moiety and $\text{C}_{60}$                                                | $\Delta H_r^\circ$ , kJ mol <sup>-1</sup> | Characteristics of <i>o</i> -carboranylfullerenyl radicals                                                                                 |                                                                    |                           |
|                                                                                                                             |                                           | Spin density at the carbon atom of the fullerene core in position 4 toward the attachment site of <i>o</i> -carboranyl moiety <sup>a</sup> | Positive charge at the 4-C atom of the fullerene core <sup>a</sup> | $-E_{\text{SOMO}}$ , a.e. |
| C-C                                                                                                                         | +0.3                                      | 0.220                                                                                                                                      | 0.150                                                              | 0.201                     |
| 9-B-C                                                                                                                       | -5.6                                      | 0.203                                                                                                                                      | 0.077                                                              | 0.177                     |

<sup>a</sup>The averaged value for two atoms in positions 4. Note that the spin densities are twice larger at the 2-C atoms of the fullerene cage (~0.4 for both radicals). However, we consider only the dimerization 1,4-1',4' as the only probable mode due to steric hindrances making two other modes, 1,2-1',2' and 1',2-1',4', impossible.

**Table S3. Heat effects ( $\Delta H_r^\circ$ ) of formation of the regioisomeric  $\cdot \text{C}_{70}(\textit{o}\text{-C}_2\text{HB}_{10}\text{H}_{10})$  radicals via reaction  $\text{C}_{70}^{2+} + [\text{Mn}(\text{OAc})_2(\textit{o}\text{-C}_2\text{HB}_{10}\text{H}_{10})]^- \rightarrow \cdot \text{C}_{70}(\textit{o}\text{-C}_2\text{HB}_{10}\text{H}_{10}) + \cdot \text{Mn}(\text{OAc})_2$  against the curvature indices of the reaction sites of the  $\text{C}_{70}$  molecule**

| Reaction site of the $\text{C}_{70}$ molecule | Curvature index of the reaction site, $\text{\AA}^{-1}$ (from Ref. 21) | $\Delta H_r^\circ$ , kJ mol <sup>-1</sup> |
|-----------------------------------------------|------------------------------------------------------------------------|-------------------------------------------|
| <i>a</i>                                      | 0.3028                                                                 | -340.9                                    |
| <i>b</i>                                      | 0.2972                                                                 | -340.0                                    |
| <i>c</i>                                      | 0.2852                                                                 | -335.2                                    |
| <i>d</i>                                      | 0.2522                                                                 | -333.0                                    |
| <i>e</i>                                      | 0.2116                                                                 | -288.7                                    |

\*The above product-forming step seems to be irreversible, so that is kinetically controlled rather than thermodynamically. However, in the frameworks of the Bell-Evans-Polyanyi (BEP) principle<sup>S2</sup> the conclusion based on the heat effects that the additions to the carbons in positions *a* are more favorable appears to be valid. With that, the ratio of the regioisomers obtained could be affected by the point that the amount of the *a* sites is 10, while those of the *c* and *d* are 20 and 20.

**The optimized geometries of the compounds studied (with total energies, zero-point vibration energies and thermal corrections, T = 298 K)**

**Fullerene C<sub>60</sub> (I<sub>h</sub>)**

$$E_{\text{tot}} = -2284.295425 \text{ a.u.}; \epsilon_{\text{ZPV}} = 967.18 \text{ kJ mol}^{-1}; H_{\text{corr}} = 1025.28 \text{ kJ mol}^{-1};$$

$$G_{\text{corr}} = 861.77 \text{ kJ mol}^{-1}$$

|   |             |             |             |   |             |             |             |
|---|-------------|-------------|-------------|---|-------------|-------------|-------------|
| 6 | 2.87130356  | 2.08615446  | -0.16169021 | 6 | 1.30052412  | -2.86379266 | -1.65224087 |
| 6 | 1.84913206  | 3.03343964  | -0.03901726 | 6 | 0.39846745  | -3.48541141 | 0.56187332  |
| 6 | 3.19661760  | 1.21900547  | 0.95824325  | 6 | 0.27647027  | -3.42965698 | -0.88520515 |
| 6 | 1.11262274  | 3.15032315  | 1.20834792  | 6 | -0.91522723 | -3.24053574 | 1.13307416  |
| 6 | 2.48761201  | 1.33152390  | 2.15902758  | 6 | -1.11262286 | -3.15032339 | -1.20834792 |
| 6 | 1.42578840  | 2.31555629  | 2.28645945  | 6 | -1.84913230 | -3.03344011 | 0.03901730  |
| 6 | 2.99922228  | 1.30921817  | -1.38317883 | 6 | -2.10019231 | -1.50858009 | 2.43637991  |
| 6 | 0.91522717  | 3.24053574  | -1.13307416 | 6 | -1.03836882 | -2.49261260 | 2.30894828  |
| 6 | 2.10019231  | 1.50858033  | -2.43637991 | 6 | -1.57065940 | -0.36835387 | 3.16542482  |
| 6 | 1.03836870  | 2.49261260  | -2.30894828 | 6 | 0.14740735  | -1.96055162 | 2.95923591  |
| 6 | -0.27647024 | 3.42965698  | 0.88520521  | 6 | -0.18156636 | -0.64768749 | 3.48856759  |
| 6 | -0.39846745 | 3.48541141  | -0.56187332 | 6 | 0.76638174  | 0.38041869  | 3.44826221  |
| 6 | -1.30052412 | 2.86379290  | 1.65224111  | 6 | 2.08007646  | 0.13554311  | 2.87706161  |
| 6 | -1.53996265 | 2.97321963  | -1.18787730 | 6 | 2.39676499  | -1.12829435 | 2.36749673  |
| 6 | -2.48630023 | 2.33173180  | 1.00195313  | 6 | -1.95993078 | 0.92865485  | 2.81404352  |
| 6 | -2.60374165 | 2.38540435  | -0.39108640 | 6 | 0.36200961  | 1.72774112  | 3.08325028  |
| 6 | -2.89383602 | 1.13575089  | 1.71998668  | 6 | -0.97521001 | 1.99664366  | 2.77217460  |
| 6 | -3.13327456 | 1.24517775  | -1.12013137 | 6 | 1.41204417  | -2.19628286 | 2.40936589  |
| 6 | -3.40359426 | 0.03810429  | 1.01816690  | 6 | -1.42578852 | -2.31555629 | -2.28645921 |
| 6 | -3.52559161 | 0.09385878  | -0.42891160 | 6 | -2.48761201 | -1.33152378 | -2.15902758 |
| 6 | -2.99922228 | -1.30921793 | 1.38317871  | 6 | -0.36200950 | -1.72774076 | -3.08324981 |
| 6 | -3.19661784 | -1.21900535 | -0.95824319 | 6 | -2.08007622 | -0.13554296 | -2.87706113 |
| 6 | -2.87130380 | -2.08615470 | 0.16169026  | 6 | -0.76638162 | -0.38041854 | -3.44826198 |
| 6 | 3.52559137  | -0.09385867 | 0.42891172  | 6 | 0.18156651  | 0.64768767  | -3.48856783 |
| 6 | 3.40359426  | -0.03810422 | -1.01816678 | 6 | 1.57065952  | 0.36835402  | -3.16542506 |
| 6 | 3.13327479  | -1.24517751 | 1.12013149  | 6 | 1.95993102  | -0.92865485 | -2.81404376 |
| 6 | 2.89383602  | -1.13575065 | -1.71998692 | 6 | 0.97521007  | -1.99664330 | -2.77217460 |
| 6 | 2.60374165  | -2.38540411 | 0.39108658  | 6 | -0.14740723 | 1.96055210  | -2.95923638 |

|   |            |             |             |   |             |            |             |
|---|------------|-------------|-------------|---|-------------|------------|-------------|
| 6 | 2.48630023 | -2.33173180 | -1.00195324 | 6 | -1.41204405 | 2.19628286 | -2.40936589 |
| 6 | 1.53996265 | -2.97321939 | 1.18787706  | 6 | -2.39676476 | 1.12829447 | -2.36749649 |

**Radical cation C<sub>60</sub><sup>•+</sup>**

$E_{\text{tot}} = -2284.020825$  a.u.;  $\epsilon_{\text{ZPV}} = 961.19$  kJ mol<sup>-1</sup>;  $H_{\text{corr}} = 1020.25$  kJ mol<sup>-1</sup>;

$G_{\text{corr}} = 846.49$  kJ mol<sup>-1</sup>

|   |             |             |             |   |             |             |             |
|---|-------------|-------------|-------------|---|-------------|-------------|-------------|
| 6 | 2.89017892  | 2.09161854  | -0.16276550 | 6 | 1.30036199  | -2.84192419 | -1.64479792 |
| 6 | 1.86878574  | 3.03904891  | -0.04046793 | 6 | 0.38735884  | -3.46634436 | 0.55620688  |
| 6 | 3.21815181  | 1.22462559  | 0.95721167  | 6 | 0.26650301  | -3.41116667 | -0.87625271 |
| 6 | 1.12906945  | 3.14753342  | 1.20417678  | 6 | -0.93218744 | -3.23773289 | 1.13182139  |
| 6 | 2.50638008  | 1.33594000  | 2.15551209  | 6 | -1.12924969 | -3.14770198 | -1.20436919 |
| 6 | 1.44095635  | 2.31541276  | 2.27842283  | 6 | -1.86907744 | -3.03885674 | 0.04023211  |
| 6 | 3.02015996  | 1.31474411  | -1.38478553 | 6 | -2.11881471 | -1.51231349 | 2.43508959  |
| 6 | 0.93200010  | 3.23794246  | -1.13211489 | 6 | -1.05390882 | -2.49161720 | 2.30309510  |
| 6 | 2.11861444  | 1.51249540  | -2.43516040 | 6 | -1.58478951 | -0.37121004 | 3.15876675  |
| 6 | 1.05359685  | 2.49167705  | -2.30330563 | 6 | 0.13849413  | -1.94837880 | 2.94348073  |
| 6 | -0.26660836 | 3.41109180  | 0.87594020  | 6 | -0.18699639 | -0.64885521 | 3.46818900  |
| 6 | -0.38748032 | 3.46670818  | -0.55652589 | 6 | 0.76935250  | 0.38300863  | 3.42764211  |
| 6 | -1.29981208 | 2.84169412  | 1.64506686  | 6 | 2.09363151  | 0.13917433  | 2.86879086  |
| 6 | -1.53866744 | 2.95122027  | -1.18270004 | 6 | 2.40936232  | -1.11996996 | 2.36096120  |
| 6 | -2.49885917 | 2.32056737  | 1.00018811  | 6 | -1.97352350 | 0.92089522  | 2.80956006  |
| 6 | -2.61591601 | 2.37360907  | -0.38801730 | 6 | 0.36905417  | 1.71660805  | 3.06487489  |
| 6 | -2.91203809 | 1.12891173  | 1.72016072  | 6 | -0.97803718 | 1.98405778  | 2.75435424  |
| 6 | -3.15201855 | 1.23906553  | -1.11811137 | 6 | 1.41252685  | -2.18318725 | 2.39278507  |
| 6 | -3.42451286 | 0.03260212  | 1.01918674  | 6 | -1.44097877 | -2.31550264 | -2.27862740 |
| 6 | -3.54590654 | 0.08844190  | -0.42783082 | 6 | -2.50633287 | -1.33593822 | -2.15549850 |
| 6 | -3.02055740 | -1.31454039 | 1.38481998  | 6 | -0.36882684 | -1.71665680 | -3.06461668 |
| 6 | -3.21824479 | -1.22469890 | -0.95723939 | 6 | -2.09352994 | -0.13922837 | -2.86863995 |
| 6 | -2.89070010 | -2.09162855 | 0.16292121  | 6 | -0.76931477 | -0.38320297 | -3.42761230 |
| 6 | 3.54582310  | -0.08836643 | 0.42749840  | 6 | 0.18705420  | 0.64854550  | -3.46831751 |
| 6 | 3.42377782  | -0.03260635 | -1.01948738 | 6 | 1.58485115  | 0.37119326  | -3.15856194 |
| 6 | 3.15215921  | -1.23882174 | 1.11834753  | 6 | 1.97384870  | -0.92085516 | -2.80878639 |
| 6 | 2.91291571  | -1.12951255 | -1.72065043 | 6 | 0.97832316  | -1.98409307 | -2.75397277 |



|   |            |             |             |   |             |            |             |
|---|------------|-------------|-------------|---|-------------|------------|-------------|
| 6 | 2.61613965 | -2.37339997 | 0.38830221  | 6 | -0.13872437 | 1.94802654 | -2.94351125 |
| 6 | 2.49928880 | -2.32005882 | -1.00015819 | 6 | -1.41255379 | 2.18316579 | -2.39270449 |
| 6 | 1.53863311 | -2.95103431 | 1.18265307  | 6 | -2.40918565 | 1.11978853 | -2.36067271 |

### Fullerene C<sub>70</sub> (D<sub>5h</sub>)

$$\mathbf{E}_{\text{tot}} = -2665.106373 \text{ a.u.}; \boldsymbol{\varepsilon}_{\text{ZPV}} = 1130.85 \text{ kJ mol}^{-1}; \mathbf{H}_{\text{corr}} = 1199.39 \text{ kJ mol}^{-1};$$

$$\mathbf{G}_{\text{corr}} = 1015.68 \text{ kJ mol}^{-1}$$

|   |             |             |             |   |             |             |             |
|---|-------------|-------------|-------------|---|-------------|-------------|-------------|
| 6 | -1.75898552 | -1.20777678 | 3.56584954  | 6 | 3.33172274  | -1.24695587 | -0.92866266 |
| 6 | -1.77888894 | 0.19152856  | 3.60920691  | 6 | 2.49681234  | -1.94570208 | -1.87020469 |
| 6 | -2.63017297 | 0.93535507  | 2.70368195  | 6 | 1.52335501  | -2.88686204 | -1.43478465 |
| 6 | -1.92955089 | 2.13172865  | 2.29123545  | 6 | 3.59945917  | 0.07017341  | -1.46330690 |
| 6 | -0.63851309 | 2.13037586  | 2.92759585  | 6 | 2.24833584  | -1.06058145 | -2.98695779 |
| 6 | -0.54089308 | 0.93318129  | 3.73352933  | 6 | 2.93989038  | 0.18937857  | -2.74738050 |
| 6 | -2.11248064 | 2.69342661  | 0.99739766  | 6 | 2.35167265  | 1.40222740  | -3.12592936 |
| 6 | -1.04457140 | 3.48959756  | 0.49874550  | 6 | -1.85664654 | -3.05527878 | 2.11811852  |
| 6 | 0.24645090  | 3.48828101  | 1.13514733  | 6 | -1.97022176 | -3.42760348 | 0.77320594  |
| 6 | 0.50001907  | 2.69057584  | 2.28506517  | 6 | -0.79130983 | -3.80459213 | 0.02076799  |
| 6 | -0.84087753 | 3.68078542  | -0.92051673 | 6 | -0.92555475 | -3.30076742 | -1.32846367 |
| 6 | 1.24842787  | 3.67857003  | 0.10938720  | 6 | -2.17962790 | -2.59985685 | -1.41664135 |
| 6 | 0.58020020  | 3.81117606  | -1.16891694 | 6 | -2.82082319 | -2.67041278 | -0.12196133 |
| 6 | 1.14708519  | 3.25108099  | -2.32011628 | 6 | 0.20536184  | -2.88541245 | -2.08440876 |
| 6 | -0.49400711 | -1.91482568 | 3.65480590  | 6 | -0.04060125 | -1.94294882 | -3.12085533 |
| 6 | 0.69911480  | -1.19355965 | 3.78352094  | 6 | -1.29465389 | -1.24202824 | -3.20905972 |
| 6 | 0.67365694  | 0.25427705  | 3.81888032  | 6 | -2.33246279 | -1.46690083 | -2.26281929 |
| 6 | 1.82619715  | 0.75272965  | 3.10088086  | 6 | 0.99796867  | -1.05923676 | -3.60325885 |
| 6 | 2.56434298  | -0.38004735 | 2.60720611  | 6 | -1.03146696 | 0.07503627  | -3.74608946 |
| 6 | 1.86815357  | -1.57891893 | 3.01993251  | 6 | 0.38889599  | 0.19205655  | -4.00502586 |
| 6 | 1.78007460  | 1.97492504  | 2.37492371  | 6 | 1.04943037  | 1.40358686  | -3.76787925 |
| 6 | 2.71127939  | 2.11065412  | 1.30845380  | 6 | -2.60114169 | -1.91260862 | 2.61615610  |
| 6 | 3.44938517  | 0.97783285  | 0.81473422  | 6 | -3.42854619 | -1.18917656 | 1.74876237  |

|   |             |             |             |   |             |             |             |
|---|-------------|-------------|-------------|---|-------------|-------------|-------------|
| 6 | 3.27382135  | -0.31719062 | 1.37606764  | 6 | -3.53563523 | -1.57327795 | 0.35622492  |
| 6 | 2.46298361  | 2.99968743  | 0.19477040  | 6 | -3.63030457 | -0.37352440 | -0.44627696 |
| 6 | 3.65745974  | 1.16648293  | -0.60422707 | 6 | -3.57041979 | 0.75843453  | 0.44077960  |
| 6 | 3.05821276  | 2.42609215  | -0.99469244 | 6 | -3.43875146 | 0.25863430  | 1.79178262  |
| 6 | 2.41206455  | 2.54403067  | -2.23117805 | 6 | -3.08595490 | -0.31049681 | -1.75881004 |
| 6 | -0.55438566 | -3.05662704 | 2.76004601  | 6 | -2.74527001 | 0.98434436  | -2.23873639 |
| 6 | 0.58085346  | -3.43016744 | 2.03065920  | 6 | -2.68545580 | 2.11632299  | -1.35170555 |
| 6 | 1.81015968  | -2.67519283 | 2.16078877  | 6 | -2.96475625 | 1.98011923  | 0.03624443  |
| 6 | 2.44673395  | -2.60479665 | 0.86380553  | 6 | -1.74628067 | 1.17215848  | -3.26788020 |
| 6 | 1.61183071  | -3.30352759 | -0.07774097 | 6 | -1.64951873 | 3.00409985  | -1.83240545 |
| 6 | 0.45905066  | -3.80594659 | 0.63708967  | 6 | -1.06947660 | 2.43037534  | -3.02928329 |
| 6 | 3.21284151  | -1.47278690 | 0.47056586  | 6 | 0.30493450  | 2.54625344  | -3.26983809 |

### Radical cation $C_{70}^{+\bullet}$ ( $D_{5h}$ )

$$E_{\text{tot}} = -2664.833487 \text{ a.u.}; \epsilon_{\text{ZPV}} = 1119.25 \text{ kJ mol}^{-1}; H_{\text{corr}} = 1190.35 \text{ kJ mol}^{-1};$$

$$G_{\text{corr}} = 990.43 \text{ kJ mol}^{-1}$$

|   |             |             |             |   |             |             |             |
|---|-------------|-------------|-------------|---|-------------|-------------|-------------|
| 6 | -1.75900376 | -1.20933366 | 3.56831908  | 6 | 3.32462311  | -1.24165845 | -0.92583179 |
| 6 | -1.77792132 | 0.18980502  | 3.61435008  | 6 | 2.48577881  | -1.94290864 | -1.87036383 |
| 6 | -2.61939430 | 0.93224150  | 2.70334411  | 6 | 1.51608813  | -2.88782907 | -1.43910682 |
| 6 | -1.92554116 | 2.13493800  | 2.29391670  | 6 | 3.58908391  | 0.06843868  | -1.46481895 |
| 6 | -0.63704658 | 2.13303089  | 2.92759871  | 6 | 2.24778724  | -1.06012475 | -2.99234915 |
| 6 | -0.54010463 | 0.93063039  | 3.74005914  | 6 | 2.93890953  | 0.18893297  | -2.75081110 |
| 6 | -2.10971904 | 2.69683123  | 1.00132823  | 6 | 2.35077000  | 1.40233934  | -3.12727785 |
| 6 | -1.04148364 | 3.49137449  | 0.50332814  | 6 | -1.85797060 | -3.05780721 | 2.12045407  |
| 6 | 0.24644877  | 3.48860478  | 1.13814867  | 6 | -1.97195315 | -3.43189144 | 0.77632254  |
| 6 | 0.50142491  | 2.69571781  | 2.28967094  | 6 | -0.79354501 | -3.80519533 | 0.02391938  |
| 6 | -0.83184308 | 3.67493629  | -0.91719925 | 6 | -0.92941791 | -3.30322933 | -1.33425844 |
| 6 | 1.25360656  | 3.68277597  | 0.10703904  | 6 | -2.17786217 | -2.60587835 | -1.42205513 |
| 6 | 0.58438772  | 3.81436753  | -1.17031944 | 6 | -2.81633401 | -2.67182350 | -0.11889002 |
| 6 | 1.14902830  | 3.25254893  | -2.32166934 | 6 | 0.20107841  | -2.89072251 | -2.09055138 |
| 6 | -0.49578249 | -1.91489387 | 3.65653586  | 6 | -0.04556364 | -1.94710505 | -3.12443542 |
| 6 | 0.69629520  | -1.19239867 | 3.78765869  | 6 | -1.29383302 | -1.24948561 | -3.21258593 |

|   |             |             |             |   |             |             |             |
|---|-------------|-------------|-------------|---|-------------|-------------|-------------|
| 6 | 0.66991633  | 0.25499898  | 3.82589674  | 6 | -2.33222961 | -1.47442186 | -2.26840782 |
| 6 | 1.82365441  | 0.75591022  | 3.09903383  | 6 | 0.99829316  | -1.05592394 | -3.60530734 |
| 6 | 2.56208348  | -0.37669450 | 2.60677838  | 6 | -1.02595162 | 0.07521466  | -3.74516773 |
| 6 | 1.85918593  | -1.57033682 | 3.01700497  | 6 | 0.39108306  | 0.19378725  | -4.00981998 |
| 6 | 1.77974272  | 1.98011327  | 2.37871122  | 6 | 1.05075896  | 1.40514529  | -3.77094698 |
| 6 | 2.70701170  | 2.11127234  | 1.30986321  | 6 | -2.60084867 | -1.91349828 | 2.61602068  |
| 6 | 3.44606781  | 0.97962946  | 0.81633854  | 6 | -3.42900324 | -1.19120550 | 1.74872279  |
| 6 | 3.27252626  | -0.31479114 | 1.37726068  | 6 | -3.53487635 | -1.57557535 | 0.35727194  |
| 6 | 2.46375608  | 3.00734210  | 0.19261689  | 6 | -3.61808968 | -0.37937334 | -0.44787979 |
| 6 | 3.64579797  | 1.17091620  | -0.60163546 | 6 | -3.55840278 | 0.75850844  | 0.44398871  |
| 6 | 3.05795050  | 2.43116117  | -0.99568719 | 6 | -3.43352127 | 0.25481310  | 1.78828931  |
| 6 | 2.41171765  | 2.54617238  | -2.23237514 | 6 | -3.08003783 | -0.31799617 | -1.76158440 |
| 6 | -0.55581504 | -3.05732322 | 2.75978017  | 6 | -2.73482537 | 0.97584563  | -2.23686099 |
| 6 | 0.57846010  | -3.43277621 | 2.03009176  | 6 | -2.67491460 | 2.11407113  | -1.34544635 |
| 6 | 1.80246413  | -2.67282748 | 2.15383863  | 6 | -2.95743632 | 1.98148429  | 0.04088799  |
| 6 | 2.44090939  | -2.59756851 | 0.86406130  | 6 | -1.74423563 | 1.17185950  | -3.26952910 |
| 6 | 1.60252559  | -3.29811049 | -0.08140457 | 6 | -1.64592850 | 2.99757123  | -1.83233809 |
| 6 | 0.45553333  | -3.81003571 | 0.63771975  | 6 | -1.06902003 | 2.42978835  | -3.03123546 |
| 6 | 3.20930743  | -1.46806979 | 0.47239703  | 6 | 0.30542952  | 2.54569268  | -3.27041483 |

**Radical (*o*-C<sub>2</sub>HB<sub>10</sub>H<sub>10</sub>)<sup>•</sup>**

$$E_{\text{tot}} = -331.020412 \text{ a.u.}; \epsilon_{\text{ZPV}} = 416.47 \text{ kJ mol}^{-1}; H_{\text{corr}} = 440.07 \text{ kJ mol}^{-1};$$

$$G_{\text{corr}} = 335.34 \text{ kJ mol}^{-1}$$

|   |             |             |             |
|---|-------------|-------------|-------------|
| 5 | -1.55623698 | -1.06940055 | 0.69580191  |
| 5 | -1.60126722 | 0.69937223  | 0.78922909  |
| 5 | -1.90189588 | -0.13246606 | -0.76769274 |
| 5 | -0.33848554 | -0.20133257 | 1.67229939  |
| 5 | 0.09492977  | 1.27972019  | 0.78917599  |
| 6 | -0.84319305 | 1.19115877  | -0.64960861 |
| 5 | 0.13503410  | -1.60640967 | 0.65621626  |
| 5 | 1.16270494  | -0.14316681 | 0.70726752  |
| 6 | 0.67857194  | 0.66935253  | -0.66465551 |
| 5 | -0.39184439 | -0.06713239 | -1.73172069 |

5 -0.82754177 -1.55480421 -0.86092895  
 5 0.86163712 -0.97626388 -0.85204643  
 1 -0.35509935 0.18716960 -2.89252853  
 1 -2.41565609 -1.72166574 1.21023571  
 1 -2.43274307 1.41105998 1.25535607  
 1 -0.30882093 -0.20918612 2.86384416  
 1 0.42884907 2.35628033 1.16734409  
 1 2.27719617 -0.02943131 1.10972309  
 1 1.77807558 -1.41056871 -1.47535789  
 1 -1.03802145 2.15156245 -1.12512684  
 1 -1.14617682 -2.52649641 -1.47330713  
 1 -2.93359756 0.02518116 -1.33853889  
 1 0.52549613 -2.63016677 1.12782085

**Radical (9-*o*-C<sub>2</sub>H<sub>2</sub>B<sub>10</sub>H<sub>9</sub>)<sup>•</sup>**

$E_{\text{tot}} = -331.028979$  a.u.;

$\epsilon_{\text{ZPV}} = 424.42$  kJ mol<sup>-1</sup>;  $H_{\text{corr}} = 447.48$  kJ mol<sup>-1</sup>;  $G_{\text{corr}} = 343.55$  kJ mol<sup>-1</sup>

5 -1.56724942 -1.08525395 0.70704311  
 5 -1.58915830 0.69538331 0.78624153  
 5 -1.88948154 -0.13516128 -0.76634365  
 5 -0.33347148 -0.21165895 1.67294550  
 5 0.09616913 1.26781166 0.79940373  
 6 -0.82516140 1.18185437 -0.64925677  
 5 0.12443989 -1.56627142 0.63714337  
 5 1.16471839 -0.15414976 0.70678157  
 6 0.73487425 0.71031314 -0.69875056  
 5 -0.39277652 -0.08437219 -1.72837245  
 5 -0.82210803 -1.56304467 -0.85336101  
 5 0.86477292 -0.98366076 -0.84394628  
 1 -0.34999135 0.17091464 -2.88793945  
 1 1.42137349 1.39301562 -1.19671869

1 -2.43422461 -1.72703075 1.21804416  
 1 -2.41983557 1.41639674 1.24109292  
 1 -0.30305123 -0.21581705 2.86572266  
 1 0.43545514 2.34334612 1.17317474  
 1 2.27972555 -0.03439427 1.10750890  
 1 1.78087294 -1.41395938 -1.47145426  
 1 -1.04461014 2.13823795 -1.11836565  
 1 -1.14136875 -2.53432441 -1.46845925  
 1 -2.91892052 0.03629835 -1.33878112

**Mn(OAc)<sub>2</sub>(*o*-C<sub>2</sub>HB<sub>10</sub>H<sub>10</sub>) (product 1)**

$E_{\text{tot}} = -1938.592333$  a.u.;  $\epsilon_{\text{ZPV}} = 163.7311$  kcal/mol;  $H_{\text{corr}} = 177.02$  kJ mol<sup>-1</sup>

|   |            |             |             |    |             |             |             |
|---|------------|-------------|-------------|----|-------------|-------------|-------------|
| 5 | 2.76417208 | -1.35967636 | 0.97767675  | 25 | 1.40758383  | 1.46497893  | -2.22160172 |
| 5 | 2.60380602 | 0.31065753  | 0.38642779  | 1  | 2.30013442  | -3.53728223 | -0.44631219 |
| 5 | 1.72643101 | -0.99776745 | -0.42726672 | 1  | 0.53394961  | -0.98602712 | -0.47283787 |
| 5 | 4.19827604 | -0.29198316 | 0.87467366  | 1  | 4.94692993  | -2.80768251 | 0.96750325  |
| 5 | 4.03425264 | 0.69977671  | -0.59204322 | 8  | 2.60822988  | 1.26260364  | -3.89648032 |
| 6 | 2.56209183 | 0.19260436  | -1.32018232 | 8  | 1.74956477  | 3.34220529  | -2.03218102 |
| 5 | 4.30081940 | -2.00468540 | 0.36485291  | 6  | 1.56336367  | 0.90356129  | -4.51076698 |
| 5 | 5.09446764 | -0.73877102 | -0.59693515 | 8  | 0.50212741  | 0.83888310  | -3.74445415 |
| 6 | 4.01240873 | -0.43863139 | -1.86192226 | 6  | 0.76346183  | 3.42136621  | -1.17549407 |
| 5 | 2.62503147 | -1.42804241 | -1.89996970 | 8  | 0.10761352  | 2.34844232  | -0.95599949 |
| 5 | 2.76626372 | -2.43949032 | -0.45129257 | 6  | 0.46794078  | 4.70922232  | -0.48426884 |
| 5 | 4.22005844 | -2.05682158 | -1.40835857 | 6  | 1.48568928  | 0.59189236  | -5.96737194 |
| 1 | 2.12683058 | -1.67918575 | -2.95065928 | 1  | 0.59610605  | 5.54829884  | -1.17823184 |
| 1 | 4.34041595 | -0.05936215 | -2.82569265 | 1  | -0.54151922 | 4.68916464  | -0.06158768 |
| 1 | 2.28209805 | -1.68294954 | 2.02022314  | 1  | 1.19596231  | 4.83458281  | 0.33156773  |
| 1 | 4.75854397 | 0.15168788  | 1.82970011  | 1  | 2.46992278  | 0.70945913  | -6.43123722 |
| 1 | 4.43135405 | 1.79786170  | -0.81564748 | 1  | 1.12752903  | -0.43832654 | -6.10204697 |
| 1 | 6.25377607 | -0.56786788 | -0.80691034 | 1  | 0.75913393  | 1.25905347  | -6.45139027 |
| 1 | 4.78684425 | -2.77785134 | -2.16773438 | 1  | 2.00572824  | 1.20646560  | 0.89718771  |

**[Mn(OAc)<sub>2</sub>(*o*-C<sub>2</sub>HB<sub>10</sub>H<sub>10</sub>)]<sup>•-</sup> (radical anion of product 1)**

$$E_{\text{tot}} = -1938.700719 \text{ a.u.};$$

$$\varepsilon_{\text{ZPV}} = 678.70 \text{ kJ mol}^{-1}; \mathbf{H}_{\text{corr}} = 735.69 \text{ kJ mol}^{-1}; \mathbf{G}_{\text{corr}} = 549.09 \text{ kJ mol}^{-1}$$

|    |            |             |             |
|----|------------|-------------|-------------|
| 5  | 2.71278882 | -1.11819458 | 0.94289613  |
| 5  | 2.60785317 | 0.53377759  | 0.29651275  |
| 5  | 1.64091957 | -0.74648786 | -0.43682095 |
| 5  | 4.18846798 | -0.13554311 | 0.74869651  |
| 5  | 3.99353337 | 0.81274831  | -0.75650829 |
| 6  | 2.44379854 | 0.41732606  | -1.41736877 |
| 5  | 4.19500589 | -1.86912489 | 0.30835208  |
| 5  | 4.99959660 | -0.67181337 | -0.73209894 |
| 6  | 3.89136815 | -0.36963657 | -1.96464097 |
| 5  | 2.46235085 | -1.25745177 | -1.91434836 |
| 5  | 2.60991931 | -2.24222612 | -0.44117418 |
| 5  | 4.03689909 | -1.97546256 | -1.45480609 |
| 1  | 1.92281425 | -1.56539583 | -2.93042517 |
| 1  | 4.20194912 | -0.03892437 | -2.95217609 |
| 1  | 2.25977635 | -1.38863015 | 2.01913786  |
| 1  | 4.81258488 | 0.30737004  | 1.67007041  |
| 1  | 4.47842264 | 1.86994743  | -1.00791121 |
| 1  | 6.16411114 | -0.56678510 | -0.98002011 |
| 1  | 4.53967571 | -2.76284933 | -2.20070267 |
| 25 | 1.46114588 | 1.73128879  | -2.55512762 |
| 1  | 2.09071970 | -3.31943583 | -0.37397298 |
| 1  | 0.44787773 | -0.71956986 | -0.41209254 |
| 1  | 4.82898664 | -2.68476105 | 0.91618997  |
| 8  | 2.63620234 | 1.37422144  | -4.21125555 |
| 8  | 2.04939151 | 3.39810300  | -1.50401735 |
| 6  | 1.64761007 | 0.74956739  | -4.73604298 |
| 8  | 0.57262284 | 0.66699070  | -4.03976679 |
| 6  | 0.89444649 | 3.39990306  | -0.95169741 |
| 8  | 0.06217710 | 2.49040294  | -1.31307399 |
| 6  | 0.53930265 | 4.39703035  | 0.12124088  |
| 6  | 1.74828160 | 0.11013612  | -6.09787798 |

1 1.07799327 5.33877563 -0.04108340  
 1 -0.54437423 4.56510210 0.14351338  
 1 0.84672844 3.98907375 1.09638643  
 1 2.53468776 0.59307367 -6.69035339  
 1 2.00439048 -0.95414525 -5.97899151  
 1 0.78253049 0.16770400 -6.61623573  
 1 2.09483838 1.46425891 0.84053063

**Radical  $\cdot\text{C}_{60}$  (*o*- $\text{C}_2\text{HB}_{10}\text{H}_{10}$ ) ( $\text{C}_1$ )**

$E_{\text{tot}} = -2615.359310$  a.u.

$\epsilon_{\text{ZPV}} = 1389.00$  kJ/mol;  $\mathbf{H}_{\text{corr}} = 1471.97$  kJ mol $^{-1}$ ;  $\mathbf{G}_{\text{corr}} = 1250.94$  kJ mol $^{-1}$

|   |            |             |             |   |             |             |            |
|---|------------|-------------|-------------|---|-------------|-------------|------------|
| 5 | 4.69184399 | -3.47440410 | -0.40924698 | 6 | -1.58426523 | 1.67325795  | 2.14567208 |
| 5 | 4.79773951 | -2.36486006 | 0.97832900  | 6 | -2.04965687 | 2.64471006  | 3.11163402 |
| 5 | 3.26786637 | -2.54217434 | 0.09125329  | 6 | -1.51716280 | 3.94210243  | 3.11982107 |
| 5 | 6.13204575 | -2.44154859 | -0.19879989 | 6 | -1.20041537 | 4.58789778  | 4.37858772 |
| 5 | 5.59667397 | -0.87915707 | 0.42374939  | 6 | 0.01900704  | 5.36223459  | 4.19496584 |
| 6 | 3.86893916 | -0.99462521 | 0.53975618  | 6 | 0.96265525  | 5.43923712  | 5.22764397 |
| 5 | 5.41274500 | -2.66467428 | -1.82113409 | 6 | 2.37952447  | 5.34907389  | 4.92376375 |
| 5 | 5.96617699 | -1.05744362 | -1.30289590 | 6 | 3.01928759  | 4.59484577  | 5.98932552 |
| 6 | 4.55404854 | -0.27153111 | -0.78817135 | 6 | 4.05707407  | 3.70467997  | 5.69105530 |
| 5 | 3.10353947 | -1.15668714 | -1.00289786 | 6 | 3.97969985  | 0.14625582  | 2.88967919 |
| 5 | 3.63584471 | -2.71938825 | -1.63675451 | 6 | 2.57026434  | 0.70170778  | 7.25594425 |
| 5 | 4.43028307 | -1.22815430 | -2.18421388 | 6 | 3.01808906  | -0.22827785 | 6.31368589 |
| 1 | 2.10064650 | -0.54822445 | -1.18492365 | 6 | 2.07322097  | -1.11353266 | 5.64999771 |
| 1 | 4.45157146 | 0.81056851  | -0.82936144 | 6 | 0.70447463  | -1.02487135 | 5.95760727 |
| 1 | 4.72652292 | -4.65399218 | -0.23831929 | 6 | 0.23985618  | -0.05409287 | 6.92493773 |
| 1 | 4.85902977 | -2.63678241 | 2.13470101  | 6 | 0.83012265  | 2.19442558  | 7.76000452 |
| 1 | 7.20354223 | -2.85685968 | 0.11707875  | 6 | 2.04927087  | 2.96904111  | 7.57617760 |
| 1 | 6.14784575 | -0.10083656 | 1.12889051  | 6 | 3.12420726  | 2.04704738  | 7.26747799 |
| 1 | 6.84027863 | -0.38180095 | -1.74453020 | 6 | 4.11296940  | 2.40676022  | 6.34412861 |
| 1 | 4.26731968 | -0.66678733 | -3.22047687 | 6 | 4.58065891  | 1.43705237  | 5.37036848 |
| 1 | 2.91083193 | -3.33383250 | -2.35593653 | 6 | 4.03661442  | 0.14710052  | 5.35009336 |
| 1 | 2.29394579 | -2.93501067 | 0.64769202  | 6 | 2.50824118  | -1.29015851 | 4.28563404 |

|   |             |             |             |   |             |             |            |
|---|-------------|-------------|-------------|---|-------------|-------------|------------|
| 1 | 5.97962999  | -3.24987411 | -2.69159174 | 6 | 1.56196880  | -1.33882833 | 3.25104928 |
| 6 | 1.38342500  | 3.27461672  | 0.93226951  | 6 | 0.14006582  | -1.25934875 | 3.56842589 |
| 6 | 1.71209538  | 1.87809956  | 0.73145860  | 6 | -0.27919912 | -1.10117793 | 4.89035130 |
| 6 | 2.93728733  | 1.37742209  | 1.14879334  | 6 | -1.35738516 | -0.17859626 | 5.20168638 |
| 6 | 3.84358001  | 2.24415755  | 1.84782922  | 6 | -1.03539348 | 0.47170666  | 6.46038675 |
| 6 | 3.55307651  | 3.60659432  | 2.03065157  | 6 | -1.34368730 | 1.82244039  | 6.64662409 |
| 6 | 2.29335546  | 4.13290691  | 1.56157148  | 6 | -0.39398584 | 2.70120382  | 7.30942440 |
| 6 | -0.03368387 | 3.36857986  | 1.23189938  | 6 | 1.99629200  | 4.22102070  | 6.94968653 |
| 6 | -0.58795327 | 2.02336121  | 1.21779811  | 6 | 0.72617072  | 4.74343252  | 6.47964334 |
| 6 | 0.47706053  | 1.10287774  | 0.90279055  | 6 | -0.44641808 | 3.99506950  | 6.65379667 |
| 6 | 0.54415560  | -0.13889579 | 1.55463123  | 6 | -1.42795324 | 3.92018867  | 5.58707285 |
| 6 | 3.13683152  | -0.08900723 | 1.61083448  | 6 | -1.98347974 | 2.57668209  | 5.58085871 |
| 6 | 4.48092079  | 1.48969364  | 2.91387558  | 6 | -2.29132128 | 1.95194364  | 4.36880636 |
| 6 | 4.80830097  | 2.12555075  | 4.12233591  | 6 | -1.97332847 | 0.54753411  | 4.17587709 |
| 6 | 4.48771858  | 3.52930450  | 4.31513786  | 6 | -1.53271985 | 0.37714136  | 2.80204391 |
| 6 | 3.87340546  | 4.25574017  | 3.29019666  | 6 | -0.49534410 | -0.50939131 | 2.51013255 |
| 6 | 2.80142999  | 5.18535423  | 3.59952688  | 6 | 3.72955251  | -0.49877498 | 4.09046698 |
| 6 | 1.82171226  | 5.10832930  | 2.52803111  | 6 | 1.78920627  | -0.68015116 | 2.00172257 |
| 6 | 0.45599446  | 5.19224644  | 2.82362008  | 6 | 1.15332377  | 0.79436159  | 7.56684923 |
| 6 | -0.49073532 | 4.30949736  | 2.15853071  |   |             |             |            |

**Radical  $\cdot\text{C}_{60}(9\text{-}o\text{-C}_2\text{H}_2\text{B}_{10}\text{H}_9)$  ( $C_S$ )**

$$E_{\text{tot}} = -2615.385343 \text{ a.u.}$$

$$\varepsilon_{\text{ZPV}} = 1393.56 \text{ kJ/mol}; \mathbf{H}_{\text{corr}} = 1476.78 \text{ kJ/mol}; \mathbf{G}_{\text{corr}} = 1252.74 \text{ kJ/mol}$$

|   |            |             |             |   |             |            |            |
|---|------------|-------------|-------------|---|-------------|------------|------------|
| 5 | 3.78405070 | -2.74996281 | -1.72586334 | 6 | -1.72724283 | 1.13023758 | 2.55233407 |
| 5 | 3.37428880 | -2.51407719 | -0.01374109 | 6 | -2.22862577 | 2.10846424 | 3.49247861 |
| 5 | 3.21695018 | -1.15780866 | -1.16931212 | 6 | -1.90239346 | 3.46493793 | 3.34210157 |
| 5 | 4.81717825 | -3.45196724 | -0.45350215 | 6 | -1.55440784 | 4.26029158 | 4.50335932 |
| 5 | 4.89741325 | -2.29941702 | 0.89991772  | 6 | -0.49469697 | 5.18240261 | 4.11930656 |
| 5 | 3.90099597 | -0.87161773 | 0.46500489  | 6 | 0.53077716  | 5.48651552 | 5.02438021 |
| 6 | 5.47444963 | -2.60844755 | -1.77116311 | 6 | 1.90405083  | 5.57228279 | 4.55978966 |
| 5 | 6.23875713 | -2.40759826 | -0.24315253 | 6 | 2.76215672  | 5.01540422 | 5.59386826 |



|   |             |             |             |   |             |             |            |
|---|-------------|-------------|-------------|---|-------------|-------------|------------|
| 5 | 5.68000269  | -0.81359833 | 0.30241033  | 6 | 3.88724756  | 4.26183987  | 5.24110222 |
| 5 | 4.64633322  | -0.11122965 | -0.97045630 | 6 | 4.04133892  | 0.49448240  | 2.74155164 |
| 5 | 4.55360413  | -1.26253569 | -2.31832075 | 6 | 3.05011058  | 1.23094630  | 7.18759823 |
| 6 | 5.96183443  | -1.11244094 | -1.34122431 | 6 | 3.53239703  | 0.29313856  | 6.26952791 |
| 1 | 4.73475933  | 1.04414928  | -1.23711979 | 6 | 2.66820264  | -0.77610552 | 5.79050112 |
| 1 | 6.45671892  | -0.12591726 | 0.88341957  | 6 | 1.34189379  | -0.85693330 | 6.25258827 |
| 1 | 3.26210213  | -3.45844316 | -2.52544975 | 6 | 0.84136128  | 0.12066842  | 7.19379044 |
| 1 | 2.42347884  | -3.05123401 | 0.46289983  | 6 | 1.16773009  | 2.49765849  | 7.78537178 |
| 1 | 4.98366785  | -4.62824774 | -0.40524846 | 6 | 2.22744489  | 3.41993976  | 7.40152025 |
| 1 | 5.04981899  | -2.66800833 | 2.02340317  | 6 | 3.39106655  | 2.63732529  | 7.03473139 |
| 1 | 7.35214472  | -2.80128503 | -0.12426665 | 6 | 4.21047640  | 3.04955792  | 5.97645903 |
| 1 | 6.84539461  | -0.73294866 | -1.84935892 | 6 | 4.71653271  | 2.07345295  | 5.02880955 |
| 1 | 4.64168310  | -0.95933616 | -3.46243358 | 6 | 4.37604904  | 0.72047180  | 5.16903639 |
| 1 | 2.17090535  | -0.70962566 | -1.52440667 | 6 | 2.97623992  | -1.01084042 | 4.40139771 |
| 1 | 6.07475090  | -3.10270572 | -2.53131485 | 6 | 1.94263196  | -1.29322088 | 3.49204373 |
| 6 | 0.81519496  | 3.02587938  | 0.87603486  | 6 | 0.56593299  | -1.38762844 | 3.97079563 |
| 6 | 1.32940829  | 1.67827809  | 0.74233311  | 6 | 0.27295324  | -1.16937709 | 5.31813526 |
| 6 | 2.64924383  | 1.39604473  | 1.06325161  | 6 | -0.89360225 | -0.38562930 | 5.68715858 |
| 6 | 3.48717856  | 2.44518113  | 1.56959438  | 6 | -0.54105824 | 0.41519856  | 6.84696770 |
| 6 | 3.01419425  | 3.76493549  | 1.68125618  | 6 | -1.03027916 | 1.71932149  | 6.96888399 |
| 6 | 1.64631641  | 4.06116247  | 1.32728767  | 6 | -0.16049409 | 2.78195834  | 7.44765711 |
| 6 | -0.55752301 | 2.94117904  | 1.33842957  | 6 | 1.91635275  | 4.58923244  | 6.69551373 |
| 6 | -0.89996737 | 1.53415132  | 1.48854280  | 6 | 0.53872263  | 4.88116026  | 6.34358692 |
| 6 | 0.25402519  | 0.75184637  | 1.11974442  | 6 | -0.48069352 | 3.99105358  | 6.71135378 |
| 6 | 0.57589525  | -0.40826452 | 1.84432209  | 6 | -1.54638135 | 3.67935276  | 5.77670431 |
| 6 | 3.11071539  | 0.03403542  | 1.60754001  | 6 | -1.88783252 | 2.27460480  | 5.93496323 |
| 6 | 4.34390402  | 1.89037097  | 2.60261178  | 6 | -2.22470665 | 1.50540304  | 4.81704426 |
| 6 | 4.70185184  | 2.67250037  | 3.71534777  | 6 | -1.71927798 | 0.14911000  | 4.69160795 |
| 6 | 4.19064474  | 4.02677155  | 3.83991480  | 6 | -1.40851152 | -0.08066667 | 3.29099631 |
| 6 | 3.36484885  | 4.56120205  | 2.84476089  | 6 | -0.28680000 | -0.83515859 | 2.94271421 |
| 6 | 2.20217252  | 5.35194969  | 3.21065235  | 6 | 4.03711128  | -0.07486486 | 4.00664425 |
| 6 | 1.13713717  | 5.03909588  | 2.27116966  | 6 | 1.93055797  | -0.71421307 | 2.18467593 |
| 6 | -0.18590809 | 4.95322418  | 2.72187972  | 6 | 1.67816567  | 1.14654219  | 7.65904284 |

6 -1.05198681 3.88684678 2.24189782

**Dimer [C<sub>60</sub>(*o*-C<sub>2</sub>HB<sub>10</sub>H<sub>10</sub>)]<sub>2</sub>**

$E_{\text{tot}} = -5230.724858$  a.u.

$\epsilon_{\text{ZPV}} = 2785.28$  kJ/mol;  $H_{\text{corr}} = 2953.35$  kJ mol<sup>-1</sup>;

|   |             |             |             |   |             |             |             |
|---|-------------|-------------|-------------|---|-------------|-------------|-------------|
| 5 | 4.98925877  | 7.98969364  | 1.84369743  | 6 | 11.75982380 | 16.68928337 | 7.70330286  |
| 5 | 4.41010332  | 9.64767456  | 1.55282223  | 6 | 12.18375492 | 15.71521187 | 6.71558332  |
| 5 | 5.66371584  | 8.94175529  | 0.51037645  | 6 | 11.70709515 | 14.39848804 | 6.78573608  |
| 5 | 4.69831991  | 9.08845043  | 3.21682048  | 6 | 10.15511990 | 12.85953331 | 5.91134405  |
| 5 | 5.19053173  | 10.71042347 | 2.73541331  | 6 | 9.13172245  | 12.71468067 | 4.98226118  |
| 6 | 5.80175209  | 10.55959702 | 1.11664236  | 6 | 7.76108837  | 12.73425388 | 5.43315983  |
| 5 | 6.14664078  | 8.04072571  | 3.19449186  | 6 | 7.45702028  | 12.90772533 | 6.79099131  |
| 5 | 6.27345896  | 9.72493362  | 3.73547387  | 6 | 6.36886501  | 13.78021145 | 7.17944908  |
| 6 | 6.85814238  | 10.56755638 | 2.37400746  | 6 | 6.76442862  | 14.49043369 | 8.38402367  |
| 5 | 7.23199606  | 9.58018112  | 1.02186084  | 6 | 6.40250063  | 15.82978916 | 8.55713177  |
| 5 | 6.74358988  | 7.95634794  | 1.51434779  | 6 | 7.36003208  | 16.78075409 | 9.09808540  |
| 5 | 7.53008413  | 9.03513813  | 2.68584681  | 6 | 9.61462212  | 18.41063499 | 8.46230984  |
| 1 | 8.09371853  | 9.93574333  | 0.28997254  | 6 | 8.27915096  | 18.85089302 | 8.10597515  |
| 1 | 7.46198988  | 11.46676254 | 2.47512889  | 6 | 7.17213964  | 18.04776955 | 8.41524982  |
| 1 | 4.28021622  | 7.05884886  | 1.61370003  | 6 | 6.09877682  | 17.88601494 | 7.45149040  |
| 1 | 3.36441565  | 9.98445034  | 1.09842360  | 6 | 5.62475586  | 16.51303673 | 7.53575087  |
| 1 | 3.79571557  | 8.96458435  | 3.98525906  | 6 | 5.25048304  | 15.83110619 | 6.37456560  |
| 1 | 4.76840782  | 11.76980305 | 3.05717754  | 6 | 5.62656498  | 14.43878651 | 6.18998575  |
| 1 | 6.55752468  | 10.13920212 | 4.81260586  | 6 | 5.94817972  | 14.24314404 | 4.79186392  |
| 1 | 8.66096687  | 8.99843121  | 3.05276203  | 6 | 6.99884129  | 13.41679096 | 4.41630888  |
| 1 | 7.31459093  | 7.01659584  | 1.05499816  | 6 | 11.30915737 | 13.70604134 | 5.58521843  |
| 1 | 5.46651125  | 8.78785229  | -0.64978194 | 6 | 9.19206429  | 13.36322403 | 3.66619253  |
| 1 | 6.29402542  | 7.14443111  | 3.96670079  | 6 | 9.02630520  | 14.96464920 | 9.25687695  |
| 5 | 11.68625164 | 10.68283844 | 0.76499075  | 6 | 3.27019167  | 11.53885078 | -2.83689499 |
| 5 | 11.51588631 | 11.38627911 | 2.39410615  | 6 | 3.69868684  | 11.48297882 | -1.46019602 |
| 5 | 10.54486752 | 12.01114273 | 1.04584885  | 6 | 5.03162622  | 11.29993439 | -1.15279269 |
| 5 | 13.13249302 | 10.98482800 | 1.76256394  | 6 | 5.99500704  | 11.21080685 | -2.19946122 |
| 5 | 12.88118649 | 12.48318291 | 2.64897490  | 6 | 5.59926081  | 11.22977161 | -3.54663277 |

|   |             |             |             |   |            |             |             |
|---|-------------|-------------|-------------|---|------------|-------------|-------------|
| 6 | 11.30212307 | 13.07094574 | 2.14081740  | 6 | 4.20403862 | 11.40091896 | -3.87322640 |
| 5 | 13.14887142 | 11.37061501 | 0.01783359  | 6 | 2.20060205 | 12.51504517 | -2.94019771 |
| 5 | 13.87706375 | 12.49257755 | 1.18707192  | 6 | 1.96030569 | 13.06641388 | -1.61682010 |
| 6 | 12.68020344 | 13.67792034 | 1.44340253  | 6 | 2.88249993 | 12.43646049 | -0.69516712 |
| 5 | 11.28777409 | 13.50980759 | 0.46677300  | 6 | 3.46782684 | 13.16779041 | 0.32949188  |
| 5 | 11.54219437 | 12.00784683 | -0.42531565 | 6 | 5.69125700 | 11.81027031 | 0.14984778  |
| 5 | 12.90071297 | 13.12282085 | -0.15450510 | 6 | 7.19934654 | 11.89284229 | -1.76852608 |
| 1 | 10.71295452 | 14.50367737 | 0.17858735  | 6 | 7.96837330 | 12.57747555 | -2.71712208 |
| 1 | 12.94454861 | 14.69708729 | 1.71783590  | 6 | 7.54850912 | 12.62668419 | -4.10745716 |
| 1 | 11.28074551 | 9.58474064  | 0.53930026  | 6 | 6.38689709 | 11.96457672 | -4.51796579 |
| 1 | 10.98309135 | 10.90212536 | 3.34054494  | 6 | 5.47244978 | 12.60256863 | -5.44509649 |
| 1 | 13.78401470 | 10.12121868 | 2.26234841  | 6 | 4.11633396 | 12.25418377 | -5.04261208 |
| 1 | 13.30312157 | 12.81633186 | 3.70216560  | 6 | 3.09306121 | 13.20391178 | -5.13797808 |
| 1 | 15.01136494 | 12.82904911 | 1.31147039  | 6 | 2.11298180 | 13.33255959 | -4.07060719 |
| 1 | 13.37462807 | 13.88448429 | -0.93587571 | 6 | 1.64089513 | 14.42418385 | -1.47453547 |
| 1 | 11.05459309 | 11.87162971 | -1.50439322 | 6 | 1.55874074 | 15.27660465 | -2.64845586 |
| 1 | 9.36473179  | 11.94953060 | 1.10602212  | 6 | 1.79215562 | 14.74267960 | -3.91974664 |
| 1 | 13.83043098 | 10.77519321 | -0.75784749 | 6 | 2.58075118 | 15.48426723 | -4.89007378 |
| 6 | 8.48552132  | 17.19902229 | 2.57972693  | 6 | 3.38287401 | 14.53445053 | -5.63986254 |
| 6 | 8.86163807  | 15.82825947 | 2.31929946  | 6 | 4.68737698 | 14.86954212 | -6.03013229 |
| 6 | 10.13950443 | 15.41353226 | 2.65449858  | 6 | 5.75086117 | 13.88586617 | -5.92945480 |
| 6 | 11.05380821 | 16.35816765 | 3.25535512  | 6 | 6.96030140 | 14.57350254 | -5.51121616 |
| 6 | 10.71706772 | 17.70643616 | 3.43352294  | 6 | 7.84235668 | 13.95399952 | -4.61620283 |
| 6 | 9.39253902  | 18.14130211 | 3.08021903  | 6 | 7.01541758 | 12.38938522 | -0.42441827 |
| 6 | 7.10846996  | 17.23767853 | 3.02926421  | 6 | 7.89893866 | 16.62692070 | -2.07550073 |
| 6 | 6.62277412  | 15.89871883 | 3.08779168  | 6 | 7.94511700 | 15.78299236 | -0.95204389 |
| 6 | 7.59469795  | 14.93078709 | 2.38156056  | 6 | 7.00227022 | 15.92229080 | 0.10790113  |
| 6 | 7.91260386  | 13.78236103 | 3.32086754  | 6 | 5.98557854 | 16.85253525 | -0.00155544 |
| 6 | 10.49023724 | 13.98406887 | 3.15084624  | 6 | 5.89871931 | 17.71455765 | -1.15496540 |
| 6 | 11.83218288 | 15.68561840 | 4.28081083  | 6 | 6.42378426 | 17.67424583 | -3.56654525 |
| 6 | 12.24852848 | 16.37383080 | 5.43383598  | 6 | 7.22680855 | 16.72286415 | -4.32244015 |
| 6 | 11.87501431 | 17.76391029 | 5.61856270  | 6 | 8.13879585 | 16.07851219 | -3.39677238 |
| 6 | 11.12321663 | 18.41592598 | 4.63600588  | 6 | 8.43915939 | 14.71963120 | -3.53642845 |

|   |             |             |            |   |            |             |             |
|---|-------------|-------------|------------|---|------------|-------------|-------------|
| 6 | 10.03578949 | 19.29730988 | 5.02243280 | 6 | 8.51346684 | 13.86084938 | -2.36668706 |
| 6 | 8.96259117  | 19.12635612 | 4.05991411 | 6 | 8.26384354 | 14.37524128 | -1.08858645 |
| 6 | 7.63114786  | 19.16137123 | 4.48740673 | 6 | 6.88696671 | 14.61146927 | 0.91236055  |
| 6 | 6.67821074  | 18.20731354 | 3.95017695 | 6 | 5.41647959 | 14.22715282 | 1.00579393  |
| 6 | 5.76949549  | 15.53000736 | 4.10950327 | 6 | 4.35041714 | 15.23512363 | 0.88787258  |
| 6 | 5.33417988  | 16.49747849 | 5.08730841 | 6 | 4.61771488 | 16.51097679 | 0.40997303  |
| 6 | 5.77502060  | 17.82645607 | 5.00775242 | 6 | 3.70391393 | 17.16785240 | -0.49957177 |
| 6 | 6.16765881  | 18.53239822 | 6.21268606 | 6 | 4.49441910 | 17.90583420 | -1.47173154 |
| 6 | 7.31974173  | 19.36322403 | 5.88891315 | 6 | 4.08676815 | 17.97073555 | -2.80685210 |
| 6 | 8.35428524  | 19.51937675 | 6.81901264 | 6 | 5.06899643 | 17.84515381 | -3.87301087 |
| 6 | 9.73768425  | 19.48956299 | 6.37818480 | 6 | 6.64362097 | 15.98291302 | -5.35766888 |
| 6 | 10.51743317 | 18.80586052 | 7.39581013 | 6 | 5.23846626 | 16.16406059 | -5.67694473 |
| 6 | 11.57054710 | 17.96281433 | 7.02247000 | 6 | 4.46533871 | 17.07809830 | -4.94683313 |
| 6 | 11.39248371 | 14.33086872 | 4.35684919 | 6 | 3.11204481 | 16.73313904 | -4.54993963 |
| 6 | 10.40990257 | 14.93543625 | 8.81078625 | 6 | 2.87439537 | 17.28616714 | -3.22675228 |
| 6 | 10.81308270 | 13.99762535 | 7.85645437 | 6 | 2.11141300 | 16.57540321 | -2.29467869 |
| 6 | 9.85739803  | 13.04455471 | 7.31535816 | 6 | 2.53078747 | 16.51548004 | -0.90479827 |
| 6 | 8.52585125  | 13.06976223 | 7.75326681 | 6 | 2.24199510 | 15.18860340 | -0.40101820 |
| 6 | 8.10423279  | 14.04895973 | 8.74048138 | 6 | 3.13791847 | 14.56521988 | 0.48114038  |
| 6 | 8.64806843  | 16.35601616 | 9.44195557 | 6 | 7.54768276 | 13.62379074 | -0.08032904 |
| 6 | 9.79564571  | 17.18293762 | 9.11514378 | 6 | 4.88650894 | 12.99257469 | 0.67586857  |
| 6 | 10.88670444 | 16.30777740 | 8.72794628 | 6 | 6.84808254 | 17.61090851 | -2.18109608 |

**Dimer [C<sub>60</sub> (9-*o*-C<sub>2</sub>H<sub>2</sub>B<sub>10</sub>H<sub>9</sub>)]<sub>2</sub>**

$$E_{\text{tot}} = -5230.779906 \text{ a.u.}$$

$$\epsilon_{\text{ZPV}} = 2795.58 \text{ kJ/mol; } H_{\text{corr}} = 2963.77 \text{ kJ/mol;}$$

|   |             |             |             |   |            |             |            |
|---|-------------|-------------|-------------|---|------------|-------------|------------|
| 5 | -2.78711867 | -6.07966375 | 0.22647710  | 6 | 4.23403502 | 2.67043114  | 6.01596785 |
| 5 | -3.17196131 | -4.35379982 | 0.05107823  | 6 | 4.65438461 | 1.71492302  | 5.00855589 |
| 5 | -2.07103777 | -5.15646076 | -1.09129667 | 6 | 4.18607759 | 0.39337900  | 5.06241512 |
| 6 | -2.75424814 | -4.99806118 | 1.56091177  | 6 | 2.62922859 | -1.13677740 | 4.18358517 |
| 5 | -2.19228792 | -3.43578935 | 1.22701430  | 6 | 1.59375703 | -1.27427959 | 3.26712036 |
| 5 | -1.69759834 | -3.48482275 | -0.48706433 | 6 | 0.22720751 | -1.27601862 | 3.73510909 |

|   |             |             |             |   |             |             |             |
|---|-------------|-------------|-------------|---|-------------|-------------|-------------|
| 6 | -1.56275558 | -6.10562563 | 1.43358147  | 6 | -0.06003186 | -1.12335694 | 5.09946203  |
| 5 | -1.18673110 | -4.58363056 | 2.13663435  | 6 | -1.14873242 | -0.26318395 | 5.51583815  |
| 5 | -0.47727209 | -3.66323543 | 0.80883145  | 6 | -0.74026352 | 0.43228233  | 6.72418451  |
| 5 | -0.40507090 | -4.71932745 | -0.63028634 | 6 | -1.10805714 | 1.76689136  | 6.92434788  |
| 5 | -1.07412326 | -6.30513000 | -0.17836659 | 6 | -0.14856604 | 2.71515179  | 7.46788883  |
| 5 | -0.09190369 | -5.38567209 | 0.98910177  | 6 | 2.08906889  | 4.36832523  | 6.83045816  |
| 1 | 0.47581118  | -4.63476610 | -1.42993498 | 6 | 0.74649537  | 4.80597162  | 6.49781609  |
| 1 | 0.34436184  | -2.83732605 | 1.02715755  | 6 | -0.35262999 | 3.99245286  | 6.80911446  |
| 1 | -3.59859848 | -6.94591379 | 0.23562633  | 6 | -1.43556464 | 3.83851910  | 5.85497618  |
| 1 | -4.31024313 | -4.05935955 | -0.12861978 | 6 | -1.90045929 | 2.46126676  | 5.92307615  |
| 1 | -3.49837780 | -5.17845726 | 2.33317137  | 6 | -2.28415704 | 1.79559040  | 4.75452185  |
| 1 | -2.69412756 | -2.53785563 | 1.82088268  | 6 | -1.90490746 | 0.40762061  | 4.54362249  |
| 1 | -1.02472365 | -4.54920244 | 3.31175733  | 6 | -1.60290229 | 0.23401155  | 3.13776660  |
| 1 | 0.91318369  | -5.85203171 | 1.42067063  | 6 | -0.54967159 | -0.57660085 | 2.73691630  |
| 1 | -0.72452366 | -7.38653946 | -0.52849787 | 6 | 3.77904773  | -0.28414500 | 3.85589361  |
| 1 | -2.40387559 | -5.40180111 | -2.20703459 | 6 | 1.63305318  | -0.59133375 | 1.96686220  |
| 1 | -1.61048758 | -6.93815899 | 2.13130641  | 6 | 1.53043807  | 0.90648305  | 7.57617235  |
| 5 | 4.24982595  | -3.32581997 | -1.09123683 | 6 | -4.18766451 | -2.52738953 | -4.50804520 |
| 5 | 4.00324535  | -2.66411161 | 0.54221398  | 6 | -3.78156710 | -2.55810571 | -3.12385917 |
| 5 | 3.14537740  | -1.95708990 | -0.85675848 | 6 | -2.44757581 | -2.70129204 | -2.79079461 |
| 5 | 5.63790703  | -3.12021923 | 0.00599854  | 6 | -1.46713054 | -2.80190444 | -3.82250738 |
| 5 | 5.39993858  | -1.62399149 | 0.92949665  | 6 | -1.84278703 | -2.80965424 | -5.17736578 |
| 5 | 3.82667494  | -0.88574660 | 0.40515012  | 6 | -3.23487902 | -2.66483498 | -5.52886343 |
| 6 | 5.70011806  | -2.61679697 | -1.61294723 | 6 | -5.26928234 | -1.56735897 | -4.64130497 |
| 5 | 6.49860287  | -1.63637912 | -0.44795859 | 6 | -5.54087782 | -1.00260174 | -3.32958412 |
| 5 | 5.39253616  | -0.26617649 | -0.21768451 | 6 | -4.62189102 | -1.60558689 | -2.38519573 |
| 5 | 4.00629377  | -0.47015619 | -1.32100141 | 6 | -4.06554222 | -0.85121316 | -1.35995746 |
| 5 | 4.23726273  | -1.97158110 | -2.24220681 | 6 | -1.81983721 | -2.16596580 | -1.49514639 |
| 6 | 5.56084490  | -0.99541205 | -1.73732042 | 6 | -0.28148147 | -2.09521198 | -3.38175058 |
| 1 | 3.57939601  | 0.47955126  | -1.89287257 | 6 | 0.49633867  | -1.41163099 | -4.32729721 |
| 1 | 5.87263441  | 0.81153286  | -0.06744243 | 6 | 0.09563634  | -1.38735759 | -5.72449398 |
| 1 | 3.97225809  | -4.40458775 | -1.50730157 | 6 | -1.05036771 | -2.07242155 | -6.14413786 |
| 1 | 3.43428278  | -3.30457139 | 1.37182474  | 6 | -1.95929980 | -1.46108258 | -7.09482098 |

|   |             |             |             |   |             |             |             |
|---|-------------|-------------|-------------|---|-------------|-------------|-------------|
| 1 | 6.28879833  | -4.06302929 | 0.32477874  | 6 | -3.31624913 | -1.82562864 | -6.70920515 |
| 1 | 5.85578632  | -1.51037538 | 2.02230048  | 6 | -4.35209608 | -0.89298189 | -6.83392572 |
| 1 | 7.67918968  | -1.53545606 | -0.51895106 | 6 | -5.35139084 | -0.76577044 | -5.78423548 |
| 1 | 6.12223816  | -0.52413398 | -2.54076552 | 6 | -5.88270187 | 0.35168579  | -3.21004438 |
| 1 | 4.04738140  | -2.08015990 | -3.40870976 | 6 | -5.95708227 | 1.18716180  | -4.39686680 |
| 1 | 1.97852683  | -2.09080744 | -1.01834559 | 6 | -5.69734383 | 0.64053702  | -5.65802526 |
| 1 | 6.34735346  | -3.09536362 | -2.34386992 | 6 | -4.90403748 | 1.38212919  | -6.62479210 |
| 6 | 0.89428747  | 3.24363351  | 0.94260561  | 6 | -4.07510662 | 0.43552038  | -7.34921122 |
| 6 | 1.27527094  | 1.87856472  | 0.65747517  | 6 | -2.77011538 | 0.78618985  | -7.72370386 |
| 6 | 2.55733418  | 1.46258569  | 0.97669607  | 6 | -1.69334948 | -0.17973225 | -7.59180069 |
| 6 | 3.47470880  | 2.40634394  | 1.57485723  | 6 | -0.50185895 | 0.53245205  | -7.16365528 |
| 6 | 3.13360190  | 3.75169802  | 1.77460456  | 6 | 0.37575611  | -0.06122775 | -6.24613762 |
| 6 | 1.80218816  | 4.18461514  | 1.44514382  | 6 | -0.50481766 | -1.57964039 | -2.05124736 |
| 6 | -0.47752160 | 3.26626945  | 1.40975618  | 6 | 0.34954804  | 2.64517212  | -3.73994279 |
| 6 | -0.95806175 | 1.92285097  | 1.44829667  | 6 | 0.38919002  | 1.81691718  | -2.60513377 |
| 6 | 0.01527364  | 0.97142780  | 0.72135091  | 6 | -0.57112700 | 1.95544136  | -1.55832565 |
| 6 | 0.34810874  | -0.18622512 | 1.64077771  | 6 | -1.60077763 | 2.86711478  | -1.69829917 |
| 6 | 2.91304493  | 0.03614099  | 1.44734490  | 6 | -1.68227720 | 3.71231818  | -2.86517382 |
| 6 | 4.26741648  | 1.72318256  | 2.57766795  | 6 | -1.11780143 | 3.64871359  | -5.26800728 |
| 6 | 4.69871092  | 2.39425015  | 3.73666453  | 6 | -0.28808802 | 2.70006847  | -5.99876595 |
| 6 | 4.31817627  | 3.77897525  | 3.94749236  | 6 | 0.61955678  | 2.08267474  | -5.05077648 |
| 6 | 3.54961967  | 4.44210529  | 2.98431325  | 6 | 0.94467193  | 0.72757447  | -5.16814899 |
| 6 | 2.46184659  | 5.31064320  | 3.40014195  | 6 | 1.01689172  | -0.11579412 | -3.98502517 |
| 6 | 1.37811875  | 5.15032482  | 2.44756007  | 6 | 0.73214293  | 0.41271490  | -2.71841621 |
| 6 | 0.05235730  | 5.17108822  | 2.89174390  | 6 | -0.67897147 | 0.65169954  | -0.74146450 |
| 6 | -0.90179765 | 4.21903896  | 2.35103536  | 6 | -2.14514399 | 0.24731603  | -0.65979362 |
| 6 | -1.79378152 | 1.53267241  | 2.47810888  | 6 | -3.22342229 | 1.23635423  | -0.81408393 |
| 6 | -2.22151089 | 2.48203492  | 3.47728300  | 6 | -2.97018719 | 2.51156259  | -1.30123365 |
| 6 | -1.78819835 | 3.81491399  | 3.41407275  | 6 | -3.87812853 | 3.13929462  | -2.23751593 |
| 6 | -1.38550997 | 4.50401211  | 4.62509966  | 6 | -3.08314705 | 3.87588096  | -3.20752478 |
| 6 | -0.24270479 | 5.34753132  | 4.30023003  | 6 | -3.47100449 | 3.91835213  | -4.55033207 |
| 6 | 0.80193102  | 5.49539280  | 5.22073174  | 6 | -2.46992850 | 3.79419255  | -5.59896564 |
| 6 | 2.17999530  | 5.48028708  | 4.76234818  | 6 | -0.84268826 | 1.93854463  | -7.03436708 |

|   |            |             |            |   |             |             |             |
|---|------------|-------------|------------|---|-------------|-------------|-------------|
| 6 | 2.97644806 | 4.78512383  | 5.75891209 | 6 | -2.24530172 | 2.09371424  | -7.37872839 |
| 6 | 4.02914381 | 3.95406532  | 5.35833263 | 6 | -3.04416633 | 3.00516534  | -6.67328978 |
| 6 | 3.82853842 | 0.36597574  | 2.63665938 | 6 | -4.39762068 | 2.64350033  | -6.29223967 |
| 6 | 2.90840006 | 0.89279783  | 7.11269379 | 6 | -4.66575527 | 3.21113157  | -4.98043060 |
| 6 | 3.30527425 | -0.02737714 | 6.13763571 | 6 | -5.43130159 | 2.50006580  | -4.05050278 |
| 6 | 2.34821630 | -0.97817904 | 5.59588289 | 6 | -5.03550434 | 2.46522260  | -2.65329552 |
| 6 | 1.02188683 | -0.96866912 | 6.05089760 | 6 | -5.31120157 | 1.14033532  | -2.13673973 |
| 6 | 0.60682815 | -0.00700392 | 7.05731726 | 6 | -4.42113018 | 0.54321200  | -1.23159671 |
| 6 | 1.14636588 | 2.29258728  | 7.78836346 | 6 | 0.00837168  | -0.33508003 | -1.71457100 |
| 6 | 2.28526497 | 3.13134265  | 7.46092701 | 6 | -2.64741063 | -0.99833667 | -0.99233431 |
| 6 | 3.37650800 | 2.26867676  | 7.04631281 | 6 | -0.71507186 | 3.61009574  | -3.87551284 |

**Radical  $\dot{\text{C}}_{70-a}-(o\text{-C}_2\text{HB}_{10}\text{H}_{10})$**

$$E_{\text{tot}} = -2996.168245 \text{ a.u.}; \epsilon_{\text{ZPV}} = 1552.33 \text{ kJ mol}^{-1}; H_{\text{corr}} = 1645.91 \text{ kJ mol}^{-1}$$

|   |             |             |             |   |             |             |             |
|---|-------------|-------------|-------------|---|-------------|-------------|-------------|
| 5 | -1.73306215 | -4.96340561 | -0.05992717 | 6 | 1.64036703  | -1.21675849 | -1.46349001 |
| 6 | -0.34837812 | -4.07651091 | -0.61420202 | 6 | 1.10565209  | -1.98043621 | -0.38381487 |
| 5 | -0.12321149 | -5.21296072 | 0.64672476  | 6 | 1.81248450  | -1.58842206 | 0.79309666  |
| 6 | -1.42265868 | -4.69040966 | -1.71964800 | 6 | -0.31841642 | -2.51503849 | -0.36352590 |
| 5 | 0.23578386  | -4.63238287 | -2.14472532 | 6 | 1.99380386  | 5.53489447  | -0.40717793 |
| 5 | 1.08832514  | -5.02024078 | -0.63945663 | 6 | 1.94634104  | 4.89504766  | -1.65219927 |
| 5 | -2.00538754 | -6.22184706 | -1.28174281 | 6 | 2.75773382  | 3.72097802  | -1.89867651 |
| 5 | -0.79278302 | -6.01838732 | -2.56773853 | 6 | 0.67499691  | 4.68152094  | -2.31226730 |
| 5 | 0.81735128  | -6.27927208 | -1.86191642 | 6 | 0.70977622  | 3.39476371  | -2.97144794 |
| 5 | 0.59362513  | -6.64568901 | -0.12818225 | 6 | 1.99848938  | 2.79983282  | -2.71762156 |
| 5 | -1.15381730 | -6.60501719 | 0.23159552  | 6 | 2.14819384  | 1.39457703  | -2.59069920 |
| 5 | -0.56974620 | -7.26869106 | -1.32361758 | 6 | 1.03729081  | 0.59755081  | -2.99888182 |
| 1 | 1.35015368  | -7.34033871 | 0.47763687  | 6 | -0.25004762 | 1.19559062  | -3.24599934 |
| 1 | 1.71950173  | -6.69833088 | -2.51837087 | 6 | -0.45867670 | 2.59504271  | -3.10336137 |
| 1 | -2.61154008 | -4.35282469 | 0.45220476  | 6 | -1.26735389 | 0.23824129  | -2.87550759 |
| 1 | -2.05645323 | -3.95291924 | -2.20718169 | 6 | -0.62242407 | -0.96626854 | -2.40344739 |
| 1 | 0.58128422  | -3.81225586 | -2.93029141 | 6 | 0.81718117  | -0.72594881 | -2.47984624 |
| 1 | -1.10379565 | -6.13666725 | -3.71009517 | 6 | -1.17672253 | -1.70609665 | -1.36741555 |

|   |             |             |             |   |             |             |             |
|---|-------------|-------------|-------------|---|-------------|-------------|-------------|
| 1 | -0.66992772 | -8.42470551 | -1.59733701 | 6 | 0.76415604  | 5.99129105  | 0.21697496  |
| 1 | 2.11389875  | -4.46162367 | -0.41789037 | 6 | -0.46212709 | 5.78890419  | -0.42984378 |
| 1 | -1.66896367 | -7.26009035 | 1.08354795  | 6 | -0.50520003 | 5.11914444  | -1.71268630 |
| 1 | 0.08299077  | -4.78585720 | 1.73756254  | 6 | -1.61706054 | 5.34226370  | 0.32070357  |
| 1 | -3.13443947 | -6.47815847 | -1.55562639 | 6 | -2.37568760 | 4.42296267  | -0.50163549 |
| 6 | 2.16983724  | 5.15463257  | 1.90196419  | 6 | -1.68707478 | 4.28485584  | -1.75755715 |
| 6 | 2.29105854  | 4.15057230  | 2.87066674  | 6 | -1.70494413 | 3.05835676  | -2.47660470 |
| 6 | 1.12607372  | 3.70693779  | 3.60807204  | 6 | -2.65313029 | 2.08963251  | -2.04690719 |
| 6 | 3.10183835  | 2.97936511  | 2.60823417  | 6 | -3.33950996 | 2.22572780  | -0.79083788 |
| 6 | 2.44949460  | 1.82711375  | 3.19354320  | 6 | -3.09739137 | 3.33705878  | 0.06485089  |
| 6 | 1.22670186  | 2.27850556  | 3.81010032  | 6 | -3.55795312 | 0.89592701  | -0.26306024 |
| 6 | 0.07127972  | 1.45055008  | 3.85110021  | 6 | -3.02184582 | -0.06796910 | -1.19892001 |
| 6 | 0.26434049  | 0.08414604  | 3.50733256  | 6 | -2.45464087 | 0.67642647  | -2.29240751 |
| 6 | 1.48633254  | -0.37225786 | 2.89665294  | 6 | -2.36883020 | -1.22401023 | -0.72952420 |
| 6 | 2.54524183  | 0.53938955  | 2.60524774  | 6 | 0.87281603  | 5.75617695  | 1.64425945  |
| 6 | 1.15954971  | -1.46651900 | 2.02075458  | 6 | -0.24898143 | 5.32860470  | 2.36629081  |
| 6 | -0.28113112 | -1.70475996 | 2.08395100  | 6 | -1.51261353 | 5.11644125  | 1.69157803  |
| 6 | -0.81927705 | -0.73005563 | 3.00572467  | 6 | -0.11866673 | 4.28417301  | 3.36045194  |
| 6 | -0.99793166 | -2.08876920 | 0.96079576  | 6 | -1.30078542 | 3.45078444  | 3.31081772  |
| 6 | 2.86361456  | 5.02087402  | 0.63446230  | 6 | -2.16401768 | 3.96537876  | 2.28091478  |
| 6 | 3.65327311  | 3.89019871  | 0.38834783  | 6 | -2.98715019 | 3.09905910  | 1.51092279  |
| 6 | 3.77150083  | 2.85294962  | 1.39228702  | 6 | -3.12727547 | 1.76752412  | 1.99379027  |
| 6 | 3.59576464  | 3.22952080  | -0.89921296 | 6 | -2.26635218 | 1.25485480  | 3.02502584  |
| 6 | 3.69772339  | 1.80128086  | -0.68921733 | 6 | -1.24210107 | 2.05899596  | 3.59611106  |
| 6 | 3.80711913  | 1.56862938  | 0.72613436  | 6 | -2.06860662 | -0.15784007 | 2.77624297  |
| 6 | 3.25009441  | 0.40424174  | 1.32444525  | 6 | -2.80755377 | -0.52837455 | 1.59849453  |
| 6 | 2.83464813  | -0.62013692 | 0.43566072  | 6 | -3.45239854 | 0.67033100  | 1.10793054  |
| 6 | 2.72981977  | -0.39094812 | -0.96986932 | 6 | -2.25854349 | -1.45788968 | 0.69555402  |
| 6 | 3.02905703  | 0.87527013  | -1.53714263 |   |             |             |             |

**Radical  $\cdot\text{C}_{70}\text{-}b\text{-(}o\text{-C}_2\text{HB}_{10}\text{H}_{10}\text{)}$**

$$\mathbf{E}_{\text{tot}} = -2996.167610 \text{ a.u.}; \mathbf{\epsilon}_{\text{ZPV}} = 1551.92 \text{ kJ mol}^{-1}; \mathbf{H}_{\text{corr}} = 1645.54 \text{ kJ mol}^{-1}$$

|   |             |             |            |   |             |             |             |
|---|-------------|-------------|------------|---|-------------|-------------|-------------|
| 6 | 23.98654175 | -5.04811192 | 0.17769241 | 6 | 23.73908424 | -1.72186816 | -1.49060392 |
|---|-------------|-------------|------------|---|-------------|-------------|-------------|



|   |             |             |             |   |             |             |             |
|---|-------------|-------------|-------------|---|-------------|-------------|-------------|
| 6 | 23.03715515 | -4.15237713 | -0.84682113 | 6 | 22.86279678 | -2.60344529 | -0.57315397 |
| 5 | 24.58661079 | -4.71650839 | -1.38947201 | 6 | 23.41030502 | -2.15269113 | 0.80067801  |
| 5 | 22.28599358 | -5.23265553 | 0.27636790  | 6 | 21.40753746 | -2.17898345 | -0.70362794 |
| 5 | 21.73483849 | -5.12651014 | -1.40553856 | 6 | 25.55381012 | 4.73071337  | -0.02079880 |
| 5 | 23.14974594 | -4.79660606 | -2.42958713 | 6 | 25.56813049 | 4.13700247  | -1.28861201 |
| 5 | 23.38985825 | -6.62028265 | 0.40717527  | 6 | 26.08748817 | 2.79533195  | -1.45665741 |
| 5 | 21.95440102 | -6.71123362 | -0.63490665 | 6 | 24.41853905 | 4.25903273  | -2.16203547 |
| 5 | 22.49125671 | -6.44648981 | -2.31818390 | 6 | 24.24579620 | 3.01082253  | -2.87339067 |
| 5 | 24.25679016 | -6.18667507 | -2.30791473 | 6 | 25.27882004 | 2.10902619  | -2.43862748 |
| 5 | 24.80646324 | -6.30044031 | -0.62036383 | 6 | 25.04225731 | 0.70893115  | -2.35489917 |
| 5 | 23.51486397 | -7.37625790 | -1.19721675 | 6 | 23.85853958 | 0.22745050  | -2.97283173 |
| 1 | 24.97404099 | -6.47893763 | -3.21376443 | 6 | 22.82906342 | 1.12721896  | -3.41284943 |
| 1 | 21.92645645 | -6.93147898 | -3.24968505 | 6 | 22.95616531 | 2.53337431  | -3.23710012 |
| 1 | 24.44404221 | -4.48925400 | 0.99091053  | 6 | 21.55774498 | 0.45096588  | -3.27370453 |
| 1 | 21.72636604 | -4.75358295 | 1.20713139  | 6 | 21.79457092 | -0.87741148 | -2.76747608 |
| 1 | 20.69896126 | -4.58607388 | -1.62258291 | 6 | 23.23229027 | -1.00924802 | -2.56146836 |
| 1 | 21.01462173 | -7.38055563 | -0.33618930 | 6 | 20.91963959 | -1.43166435 | -1.82131135 |
| 1 | 23.70477676 | -8.54840565 | -1.30450249 | 6 | 24.38920593 | 5.48094320  | 0.41304809  |
| 1 | 23.07095909 | -4.03232861 | -3.33773708 | 6 | 23.28371811 | 5.60235500  | -0.43919501 |
| 1 | 25.89968491 | -6.57214832 | -0.23736842 | 6 | 23.29906845 | 4.97615862  | -1.74437642 |
| 1 | 25.45895195 | -3.92043519 | -1.49712610 | 6 | 21.94119644 | 5.45751190  | 0.08463225  |
| 1 | 23.52760887 | -7.10706854 | 1.48402727  | 6 | 21.13342285 | 4.76862192  | -0.89808792 |
| 6 | 25.22404480 | 4.30352449  | 2.26547003  | 6 | 21.97317314 | 4.46874285  | -2.02786851 |
| 6 | 24.92166519 | 3.29923654  | 3.19303012  | 6 | 21.77610588 | 3.29253912  | -2.80182481 |
| 6 | 23.57244682 | 3.16257191  | 3.70310044  | 6 | 20.55836868 | 2.58886409  | -2.58273864 |
| 6 | 25.44351387 | 1.96043730  | 3.01023340  | 6 | 19.71543121 | 2.89207673  | -1.45323586 |
| 6 | 24.43323708 | 1.01325798  | 3.42402124  | 6 | 20.07537651 | 3.89798713  | -0.51538539 |
| 6 | 23.27585793 | 1.75403130  | 3.84963799  | 6 | 19.07225800 | 1.66480625  | -1.03903568 |
| 6 | 21.96195602 | 1.24535954  | 3.65352416  | 6 | 19.50677681 | 0.59993315  | -1.91966927 |
| 6 | 21.86357117 | -0.12343639 | 3.27870345  | 6 | 20.43274307 | 1.17887521  | -2.86764884 |
| 6 | 23.01874352 | -0.86050010 | 2.84818459  | 6 | 19.74094391 | -0.67923695 | -1.40452528 |
| 6 | 24.30057144 | -0.25299922 | 2.78884435  | 6 | 24.18555260 | 5.21697235  | 1.82491910  |
| 6 | 22.59192657 | -1.83875751 | 1.87215054  | 6 | 22.88436508 | 5.08531427  | 2.32821131  |

|   |             |             |             |   |             |             |             |
|---|-------------|-------------|-------------|---|-------------|-------------|-------------|
| 6 | 21.14826393 | -1.71514189 | 1.70963812  | 6 | 21.74530220 | 5.20416164  | 1.44150150  |
| 6 | 20.71538544 | -0.64085710 | 2.56671572  | 6 | 22.57455063 | 4.03736973  | 3.27741742  |
| 6 | 20.59573174 | -1.85256720 | 0.42624101  | 6 | 21.24913406 | 3.53101754  | 2.98916864  |
| 6 | 26.07151794 | 4.00328779  | 1.12475395  | 6 | 20.73591995 | 4.25406075  | 1.85543299  |
| 6 | 26.57831764 | 2.70968723  | 0.95594513  | 6 | 19.86914444 | 3.63047361  | 0.91515899  |
| 6 | 26.25591087 | 1.67071509  | 1.91365862  | 6 | 19.31855011 | 2.37737131  | 1.29919755  |
| 6 | 26.58333206 | 2.09501982  | -0.35659748 | 6 | 19.83502579 | 1.65117788  | 2.43243122  |
| 6 | 26.27659988 | 0.69106513  | -0.20541003 | 6 | 20.90857697 | 2.16871262  | 3.21071649  |
| 6 | 26.07504082 | 0.42863917  | 1.19776022  | 6 | 19.70880508 | 0.24027684  | 2.15352345  |
| 6 | 25.14646149 | -0.55167741 | 1.63571835  | 6 | 19.10806465 | 0.08263974  | 0.84729773  |
| 6 | 24.63956070 | -1.44208539 | 0.64019656  | 6 | 18.87657166 | 1.41098785  | 0.31825504  |
| 6 | 24.83929634 | -1.17786562 | -0.76202995 | 6 | 19.53924561 | -0.94091058 | -0.00248193 |
| 6 | 25.55400467 | -0.02139480 | -1.19801450 |   |             |             |             |

**Radical  $\dot{\text{C}}_{70\text{-c}}\text{-}(o\text{-C}_2\text{HB}_{10}\text{H}_{10})$**

$$E_{\text{tot}} = -2996.166374 \text{ a.u.}; \epsilon_{\text{ZPV}} = 1552.80 \text{ kJ mol}^{-1}; H_{\text{corr}} = 1646.25 \text{ kJ mol}^{-1}$$

|   |             |              |             |   |             |             |             |
|---|-------------|--------------|-------------|---|-------------|-------------|-------------|
| 6 | 22.36917877 | -11.16217518 | -0.21681847 | 6 | 23.25575447 | -7.74754143 | 1.00583124  |
| 6 | 22.81372261 | -10.16256523 | -1.46704757 | 6 | 22.20951080 | -8.17957401 | 0.13165146  |
| 5 | 24.01961136 | -11.11527729 | -0.66094315 | 6 | 22.82094765 | -8.59617424 | -1.22576761 |
| 5 | 21.26749420 | -10.93735695 | -1.50841177 | 6 | 20.94615746 | -7.61473274 | 0.25894824  |
| 5 | 22.29347801 | -10.85426712 | -2.95234942 | 6 | 26.88152504 | -2.28936577 | -0.95230502 |
| 5 | 23.98895836 | -10.95387554 | -2.42913485 | 6 | 26.73339462 | -2.74825430 | 0.36245957  |
| 5 | 21.51263618 | -12.52620602 | -0.74932551 | 6 | 26.84283447 | -4.16290379 | 0.65436262  |
| 5 | 21.48114014 | -12.37298775 | -2.51851273 | 6 | 25.67770386 | -2.22298670 | 1.20318377  |
| 5 | 23.17285538 | -12.38936710 | -3.09198213 | 6 | 25.15798187 | -3.29724240 | 2.02015877  |
| 5 | 24.24329948 | -12.54514694 | -1.67212415 | 6 | 25.87621880 | -4.49711370 | 1.67795181  |
| 5 | 23.20995522 | -12.63471794 | -0.22810005 | 6 | 25.23946953 | -5.76778126 | 1.71046221  |
| 5 | 22.68908882 | -13.42845535 | -1.73020709 | 6 | 23.97902107 | -5.82731199 | 2.36508870  |
| 1 | 25.31087303 | -13.07409286 | -1.70347977 | 6 | 23.26419258 | -4.63077116 | 2.71536922  |
| 1 | 23.47696304 | -12.81051636 | -4.16534281 | 6 | 23.79065132 | -3.34411573 | 2.40830898  |
| 1 | 22.11231041 | -10.65458870 | 0.71022117  | 6 | 21.85018730 | -4.91709661 | 2.61200404  |
| 1 | 20.30997276 | -10.26346207 | -1.31375432 | 6 | 21.68919563 | -6.30165625 | 2.21457863  |
| 1 | 21.97634888 | -10.10959625 | -3.82246113 | 6 | 23.00827408 | -6.85352802 | 2.05246997  |

|   |             |              |             |   |             |             |             |
|---|-------------|--------------|-------------|---|-------------|-------------|-------------|
| 1 | 20.56052589 | -12.77740002 | -3.15832138 | 6 | 20.67556572 | -6.66424131 | 1.31900001  |
| 1 | 22.63739395 | -14.61746979 | -1.80154967 | 6 | 25.97765350 | -1.27624428 | -1.46799159 |
| 1 | 24.82032585 | -10.27881813 | -2.94617438 | 6 | 24.96434784 | -0.76508194 | -0.64745373 |
| 1 | 23.48601913 | -13.11715508 | 0.82390207  | 6 | 24.80999756 | -1.24946940 | 0.70780671  |
| 1 | 24.77659416 | -10.55505466 | 0.05985369  | 6 | 23.63167381 | -0.55910569 | -1.17838013 |
| 1 | 20.64215279 | -12.93461037 | -0.04854662 | 6 | 22.66915703 | -0.89948988 | -0.15151918 |
| 6 | 26.41635704 | -2.80523372  | -3.19561028 | 6 | 23.39802551 | -1.32442677 | 1.01407218  |
| 6 | 25.82380867 | -3.75903606  | -4.03195286 | 6 | 22.87649536 | -2.32031274 | 1.88591301  |
| 6 | 24.48822212 | -3.54261994  | -4.55024099 | 6 | 21.50611115 | -2.65917873 | 1.70820832  |
| 6 | 25.93590736 | -5.16939688  | -3.72268677 | 6 | 20.77722359 | -2.23349905 | 0.54186761  |
| 6 | 24.69045830 | -5.82108736  | -4.06604195 | 6 | 21.40174866 | -1.45695078 | -0.47401565 |
| 6 | 23.79490089 | -4.80562115  | -4.58091640 | 6 | 19.80355644 | -3.25522232 | 0.22666845  |
| 6 | 22.39161873 | -4.88705587  | -4.36499929 | 6 | 19.92033195 | -4.31899929 | 1.20152318  |
| 6 | 21.90245819 | -6.12532711  | -3.87779450 | 6 | 20.98468590 | -3.94618821 | 2.11152887  |
| 6 | 22.79505157 | -7.13668442  | -3.34635687 | 6 | 19.77087402 | -5.65413380 | 0.80548900  |
| 6 | 24.20801544 | -6.93397141  | -3.33744144 | 6 | 25.69148254 | -1.59370875 | -2.85478806 |
| 6 | 22.10780334 | -7.85703897  | -2.33390307 | 6 | 24.40377426 | -1.38597655 | -3.36504149 |
| 6 | 20.80098152 | -7.29547882  | -2.18070865 | 6 | 23.35730362 | -0.86288774 | -2.50933337 |
| 6 | 20.66895866 | -6.21822405  | -3.14800215 | 6 | 23.79228401 | -2.37498307 | -4.22565317 |
| 6 | 20.19476700 | -7.18175793  | -0.92236793 | 6 | 22.38003159 | -2.44459033 | -3.91733694 |
| 6 | 27.15330315 | -3.23362684  | -2.02046204 | 6 | 22.10996246 | -1.51083159 | -2.85655475 |
| 6 | 27.26557922 | -4.59982443  | -1.73041010 | 6 | 21.11020851 | -1.77391863 | -1.87902737 |
| 6 | 26.64014053 | -5.58015060  | -2.59337807 | 6 | 20.21518898 | -2.84191704 | -2.16311717 |
| 6 | 27.10638237 | -5.06868601  | -0.37038559 | 6 | 20.48444557 | -3.77418804 | -3.22490263 |
| 6 | 26.40432739 | -6.33575249  | -0.40239677 | 6 | 21.65459061 | -3.66226912 | -4.02628326 |
| 6 | 26.11438751 | -6.64985228  | -1.77418172 | 6 | 19.96472168 | -5.06306982 | -2.82323074 |
| 6 | 24.94564438 | -7.37363958  | -2.14057970 | 6 | 19.35378456 | -4.93318701 | -1.51696599 |
| 6 | 24.24152374 | -8.01011181  | -1.08896911 | 6 | 19.52761078 | -3.55908489 | -1.10653198 |
| 6 | 24.49261475 | -7.64826918  | 0.25536308  | 6 | 19.47932625 | -5.97368860 | -0.57981074 |
| 6 | 25.51074791 | -6.71464443  | 0.62488866  |   |             |             |             |

**Radial  $^{13}\text{C}_{70-d}$ -(*o*- $\text{C}_2\text{HB}_{10}\text{H}_{10}$ )**

$$E_{\text{tot}} = -2996.165688 \text{ a.u.}; \epsilon_{\text{ZPV}} = 1553.01 \text{ kJ mol}^{-1}; H_{\text{corr}} = 1646 \text{ kJ mol}^{-1}$$

|   |             |              |             |   |             |             |             |
|---|-------------|--------------|-------------|---|-------------|-------------|-------------|
| 6 | 23.66210175 | -10.98983479 | -0.14576466 | 6 | 22.20108795 | -7.75624895 | 0.85988587  |
| 6 | 23.37799835 | -10.03470802 | -1.47598124 | 6 | 21.09426880 | -7.85611153 | -0.07185485 |
| 5 | 24.97174263 | -10.64553928 | -1.19317567 | 6 | 21.63682365 | -8.12018490 | -1.36852658 |
| 5 | 22.14125443 | -11.12039185 | -0.91398704 | 6 | 19.95758438 | -7.05017948 | 0.09896277  |
| 5 | 22.51011467 | -10.94682789 | -2.64143443 | 6 | 26.97501945 | -3.22242236 | -0.85334855 |
| 5 | 24.25545883 | -10.66482830 | -2.81526732 | 6 | 26.70321655 | -3.68561888 | 0.44065452  |
| 5 | 23.00149536 | -12.54533577 | -0.30100316 | 6 | 26.47496223 | -5.09323359 | 0.67912108  |
| 5 | 22.27771187 | -12.56039906 | -1.92449188 | 6 | 25.78760910 | -2.95575094 | 1.29648387  |
| 5 | 23.58894539 | -12.28442287 | -3.10214639 | 6 | 25.01943016 | -3.90748739 | 2.06603885  |
| 5 | 25.11873436 | -12.09064102 | -2.20099282 | 6 | 25.44290543 | -5.22885942 | 1.67585754  |
| 5 | 24.74719620 | -12.25427818 | -0.47167262 | 6 | 24.53035355 | -6.31889057 | 1.65511346  |
| 5 | 23.89532471 | -13.27230167 | -1.65382576 | 6 | 23.28750038 | -6.10772800 | 2.30688381  |
| 1 | 26.18720436 | -12.39146137 | -2.63502121 | 6 | 22.85877800 | -4.78357744 | 2.70076823  |
| 1 | 23.55381393 | -12.72916317 | -4.20795393 | 6 | 23.67149353 | -3.64766788 | 2.44524646  |
| 1 | 23.67257118 | -10.46223164 | 0.80522645  | 6 | 21.42292023 | -4.73231125 | 2.56997442  |
| 1 | 21.19712639 | -10.65481853 | -0.36904657 | 6 | 20.95766068 | -6.02548742 | 2.10961556  |
| 1 | 21.73446655 | -10.36163235 | -3.32714319 | 6 | 22.12403297 | -6.86234617 | 1.94187629  |
| 1 | 21.29908562 | -13.19852257 | -2.16017485 | 6 | 19.89392662 | -6.11035490 | 1.20477045  |
| 1 | 24.08621979 | -14.44856739 | -1.69246078 | 6 | 26.34506035 | -2.00869131 | -1.33437550 |
| 1 | 24.66075706 | -9.89312935  | -3.62221837 | 6 | 25.46378517 | -1.30479336 | -0.50144309 |
| 1 | 25.49718857 | -12.56947517 | 0.39643615  | 6 | 25.17976379 | -1.78977382 | 0.83335114  |
| 1 | 25.80005646 | -9.88434410  | -0.81834650 | 6 | 24.22537231 | -0.77937716 | -1.03389084 |
| 1 | 22.57048035 | -13.05805016 | 0.68235147  | 6 | 23.19307518 | -0.92162228 | -0.02721760 |
| 6 | 26.44632721 | -3.52933550  | -3.12429023 | 6 | 23.78258705 | -1.54514420 | 1.12528765  |
| 6 | 25.66806030 | -4.28230572  | -4.01124239 | 6 | 23.02904892 | -2.42097092 | 1.95595539  |
| 6 | 24.42709732 | -3.74354672  | -4.52835989 | 6 | 21.62026596 | -2.42363882 | 1.75604570  |
| 6 | 25.44266891 | -5.69098330  | -3.75945067 | 6 | 21.03057480 | -1.79976976 | 0.59956205  |
| 6 | 24.09022522 | -6.01744938  | -4.12641859 | 6 | 21.83445740 | -1.16058111 | -0.38191891 |
| 6 | 23.45942116 | -4.81636572  | -4.60730696 | 6 | 19.85354042 | -2.56121182 | 0.23621339  |
| 6 | 22.07496262 | -4.58825588  | -4.40189266 | 6 | 19.70240402 | -3.65213180 | 1.17415023  |
| 6 | 21.30971336 | -5.71240902  | -3.96735787 | 6 | 20.80834770 | -3.56701779 | 2.10657096  |
| 6 | 21.93410873 | -6.91096020  | -3.49974132 | 6 | 19.24717331 | -4.90208101 | 0.73055655  |

|   |             |             |             |   |             |             |             |
|---|-------------|-------------|-------------|---|-------------|-------------|-------------|
| 6 | 23.35322380 | -7.01759434 | -3.42492437 | 6 | 26.01578140 | -2.19791913 | -2.73585558 |
| 6 | 21.08490372 | -7.48808575 | -2.46570373 | 6 | 24.82048988 | -1.67764056 | -3.24739146 |
| 6 | 19.92185783 | -6.63935995 | -2.31488943 | 6 | 23.90899277 | -0.96146089 | -2.37872577 |
| 6 | 20.06969643 | -5.53866243 | -3.23861217 | 6 | 24.01122856 | -2.46690106 | -4.15323162 |
| 6 | 19.35437202 | -6.42785454 | -1.05360842 | 6 | 22.61666679 | -2.22612333 | -3.85361695 |
| 6 | 27.03514671 | -4.16456270 | -1.95941949 | 6 | 22.55313110 | -1.29573870 | -2.75817466 |
| 6 | 26.81445885 | -5.52564812 | -1.72444952 | 6 | 21.50385857 | -1.35567296 | -1.79951310 |
| 6 | 25.99853516 | -6.29419136 | -2.63466883 | 6 | 20.39305687 | -2.18037677 | -2.13119507 |
| 6 | 26.52769852 | -6.00603771 | -0.38444927 | 6 | 20.45820999 | -3.11387062 | -3.22389936 |
| 6 | 25.58174324 | -7.07666159 | -0.46718949 | 6 | 21.63448334 | -3.24395895 | -4.01324749 |
| 6 | 25.22902870 | -7.25298548 | -1.87410080 | 6 | 19.64732552 | -4.26087523 | -2.87741804 |
| 6 | 23.96162033 | -7.67117596 | -2.28221107 | 6 | 19.06237030 | -4.03441477 | -1.57078493 |
| 6 | 23.12978745 | -8.47582150 | -1.27017760 | 6 | 19.53982925 | -2.74793005 | -1.10986924 |
| 6 | 23.42491913 | -7.98276138 | 0.17672838  | 6 | 18.91802025 | -5.09576941 | -0.66989684 |
| 6 | 24.59505844 | -7.28400850 | 0.54598415  |   |             |             |             |

**$\dot{\text{C}}_{70-e-(o-\text{C}_2\text{HB}_{10}\text{H}_{10})}$**

$$E_{\text{tot}} = -2996.147735 \text{ a.u.}; \epsilon_{\text{ZPV}} = 1551.46 \text{ kJ/mol}; H_{\text{corr}} = 1645.12 \text{ kJ/mol}$$

|   |             |             |             |   |             |             |             |
|---|-------------|-------------|-------------|---|-------------|-------------|-------------|
| 6 | 26.15234947 | -4.28705835 | -3.32917047 | 6 | 24.03573990 | -1.32768595 | 0.64476615  |
| 6 | 25.24129295 | -5.14681053 | -3.96066046 | 6 | 23.31843567 | -1.97013044 | 1.69265437  |
| 6 | 23.98719025 | -4.62290478 | -4.46289921 | 6 | 21.89868355 | -1.90457904 | 1.61898267  |
| 6 | 24.97049332 | -6.45804834 | -3.41966176 | 6 | 21.23410797 | -1.47157276 | 0.41937912  |
| 6 | 23.55226326 | -6.74332237 | -3.58677077 | 6 | 21.97382545 | -1.09280491 | -0.73735708 |
| 6 | 22.95634842 | -5.60806990 | -4.23841667 | 6 | 19.98388672 | -2.19004178 | 0.31714484  |
| 6 | 21.61105919 | -5.23393917 | -3.98634171 | 6 | 19.86182785 | -3.06863952 | 1.46281242  |
| 6 | 20.83356285 | -6.18055296 | -3.27119565 | 6 | 21.05952835 | -2.89365721 | 2.26014113  |
| 6 | 21.44164276 | -7.31299353 | -2.62508655 | 6 | 19.29162788 | -4.33868551 | 1.31823957  |
| 6 | 22.82732201 | -7.55199289 | -2.69129324 | 6 | 25.83536339 | -2.87913704 | -3.18332458 |
| 6 | 20.64346695 | -7.62583542 | -1.44835472 | 6 | 24.62590599 | -2.37878394 | -3.68293929 |
| 6 | 19.55401802 | -6.68207169 | -1.36832893 | 6 | 23.84769630 | -1.43985510 | -2.90222216 |
| 6 | 19.67931747 | -5.78550673 | -2.49994969 | 6 | 23.68624496 | -3.26809621 | -4.33482885 |
| 6 | 19.12934685 | -6.18308496 | -0.12773676 | 6 | 22.34404755 | -2.86356449 | -3.97671270 |
| 6 | 26.82024193 | -4.72375822 | -2.11796212 | 6 | 22.44376183 | -1.73563969 | -3.09052587 |

|   |             |             |             |   |             |              |             |
|---|-------------|-------------|-------------|---|-------------|--------------|-------------|
| 6 | 26.55477142 | -5.99543667 | -1.59898770 | 6 | 21.49224281 | -1.52890635  | -2.05209994 |
| 6 | 25.61263657 | -6.88493347 | -2.25670004 | 6 | 20.30573654 | -2.31275082  | -2.11593509 |
| 6 | 26.36325073 | -6.16991138 | -0.18233804 | 6 | 20.20648956 | -3.44051266  | -3.00261593 |
| 6 | 25.32206535 | -7.16326094 | 0.01283397  | 6 | 21.28981209 | -3.81024814  | -3.84776020 |
| 6 | 24.89686203 | -7.62997055 | -1.25757074 | 6 | 19.36842346 | -4.43364477  | -2.36691403 |
| 6 | 23.56377411 | -8.32517433 | -1.53453779 | 6 | 18.92970657 | -3.91643143  | -1.08628786 |
| 6 | 22.71908760 | -8.22314453 | -0.26395199 | 6 | 19.52639008 | -2.60621500  | -0.93251735 |
| 6 | 23.18744087 | -7.74138117 | 0.98713344  | 6 | 18.81681252 | -4.77362251  | 0.01583144  |
| 6 | 24.45451164 | -7.10181952 | 1.14509380  | 6 | 23.00369453 | -11.04356956 | -1.10949719 |
| 6 | 22.04476929 | -7.33686638 | 1.78612173  | 6 | 23.82298660 | -9.85683346  | -1.93881440 |
| 6 | 20.85541534 | -7.53502035 | 0.99952310  | 5 | 24.66719246 | -10.82440567 | -0.77635550 |
| 6 | 21.29054451 | -8.05532265 | -0.28674170 | 5 | 22.54519081 | -10.72455311 | -2.72532868 |
| 6 | 19.80079269 | -6.61864948 | 1.08151782  | 5 | 24.07669258 | -10.37679672 | -3.55257630 |
| 6 | 26.92223549 | -3.58497763 | -1.22391820 | 5 | 25.38562775 | -10.44759655 | -2.35294056 |
| 6 | 26.75302124 | -3.76580358 | 0.15425128  | 5 | 22.62542343 | -12.37860107 | -2.08196330 |
| 6 | 26.46308708 | -5.08319998 | 0.67962086  | 5 | 23.33953476 | -11.99353123 | -3.66338539 |
| 6 | 25.96518326 | -2.82316971 | 0.92160249  | 5 | 25.10121536 | -11.82673264 | -3.43223214 |
| 6 | 25.21910095 | -3.55392885 | 1.92446411  | 5 | 25.46782684 | -12.09897900 | -1.70542085 |
| 6 | 25.52617073 | -4.94899845 | 1.77358663  | 5 | 23.93453789 | -12.44127750 | -0.87886822 |
| 6 | 24.55627632 | -5.95510626 | 2.04790044  | 5 | 24.20427513 | -13.06456757 | -2.52146602 |
| 6 | 23.39232445 | -5.52515936 | 2.74684381  | 1 | 26.49876785 | -12.54809570 | -1.31039441 |
| 6 | 23.08396721 | -4.13011885 | 2.89829445  | 1 | 25.88232613 | -12.08093739 | -4.29673243 |
| 6 | 23.93306351 | -3.12467003 | 2.35723877  | 1 | 22.32377243 | -10.68044567 | -0.34279618 |
| 6 | 21.64286995 | -3.98988676 | 2.89213777  | 1 | 21.52301407 | -10.15570927 | -2.91840124 |
| 6 | 21.05188370 | -5.30518293 | 2.75278282  | 1 | 24.08032036 | -9.54956150  | -4.40606260 |
| 6 | 22.14422226 | -6.24885321 | 2.64792776  | 1 | 22.83741188 | -12.36774445 | -4.67739439 |
| 6 | 19.89950180 | -5.48121309 | 1.97699046  | 1 | 24.32509422 | -14.23447037 | -2.71731043 |
| 6 | 26.31251335 | -2.44335175 | -1.88187075 | 1 | 26.28220177 | -9.66992664  | -2.39013290 |
| 6 | 25.55952835 | -1.53035569 | -1.13422632 | 1 | 23.78555298 | -13.03689003 | 0.14035328  |
| 6 | 25.38063812 | -1.72688317 | 0.29027748  | 1 | 24.96753883 | -10.30737877 | 0.24955748  |
| 6 | 24.30475616 | -1.02389181 | -1.65248108 | 1 | 21.59195709 | -12.93136787 | -1.87666404 |
| 6 | 23.37224197 | -0.89439178 | -0.55532622 |   |             |              |             |

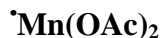

$$E_{\text{tot}} = -1607.506405 \text{ a.u.}$$

$$\epsilon_{\text{ZPV}} = 261.92 \text{ kJ/mol}; \mathbf{H}_{\text{corr}} = 291.64 \text{ kJ/mol}; \mathbf{G}_{\text{corr}} = 161.54 \text{ kJ/mol}$$

|    |             |             |             |
|----|-------------|-------------|-------------|
| 25 | -1.88651240 | -2.01159048 | -0.26993597 |
| 8  | -1.01426864 | -3.11399603 | -1.64591599 |
| 8  | -2.74682069 | -0.88968378 | 1.09726560  |
| 6  | -0.04125838 | -3.29600668 | -0.82051587 |
| 6  | -3.70748448 | -0.68557703 | 0.26256466  |
| 6  | 1.16858208  | -4.09441328 | -1.18938220 |
| 6  | -4.86509085 | 0.20182946  | 0.59380221  |
| 8  | -3.60322452 | -1.27033317 | -0.88118583 |
| 8  | -0.15863393 | -2.73254347 | 0.33267897  |
| 1  | 1.61203051  | -4.54384661 | -0.29409519 |
| 1  | 0.90671533  | -4.85868359 | -1.92924500 |
| 1  | 1.91010690  | -3.41717458 | -1.63925600 |
| 1  | -5.75058126 | -0.10205242 | 0.02507565  |
| 1  | -5.05947304 | 0.18196066  | 1.67186117  |
| 1  | -4.60711575 | 1.23311675  | 0.30957070  |

#### 4. References

S1 Y. I. Lyakhovetsky, E. A. Shilova, A. I. Belokon, L. I. Panz and B. L. Tumanskii, *J. Am. Soc. Mass Spectrom.*, 2013, **24**, 579-588.

S2 M. J. S. Dewar and R. C. Dougherty, *The PMO Theory of Organic Compounds*, Plenum Press, New York, USA, 1975.
